1 Running Head HISTORY-DRIVEN MODULATIONS IN VISUAL CORTEX

2

3

4 **History-driven modulations of population codes in early visual cortex**  
5 **during visual search**

6

7 Kirsten C.S. Adam<sup>1,2</sup> & John T. Serences<sup>1,2,3</sup>

8

9 <sup>1</sup> Department of Psychology, *University of California San Diego*

10 <sup>2</sup> Institute for Neural Computation, *University of California San Diego*

11 <sup>3</sup> Neurosciences Graduate Program, *University of California San Diego*

12

13 **Word count (abstract):** 149

14 **Word count (less abstract, methods, references, figure legends):** 4,007

15 **Word count (methods):** 2,215

16 **Tables:** 0

17 **Figures:** 7

18

19 **Keywords:** visual search; fMRI; priority maps; attentional selection; salience

20

21 **Contributions:** K.A. collected data, performed analyses, and drafted the manuscript.

22 Both authors designed the study and revised the manuscript.

23

24 **Funding:** Research was supported by National Eye Institute grant R01 EY025872

25 (J.S.) and National Institute of Mental Health grant 5T32-MH020002 (K.A.).

26

27 **Data availability:** Data will be made freely available online on the Open Science

28 Framework at <https://osf.io/wrdvz/> upon acceptance for publication.

29

30 **Acknowledgements:** We thank Rosanne Rademaker for scanning assistance and for

31 sharing custom analysis code. We thank Nicole Rangan and Matteo d'Amico for

32 assistance with behavioral data collection, and we thank Ed Awh for helpful comments

33 on the manuscript.

34

35 **Conflicts of interest:** none

36

37 **Correspondence to:**

38 Kirsten C. S. Adam

39 University of California San Diego

40 9500 Gilman Drive, Mail Code: 0109

41 La Jolla, CA 92093-0109

42 [kadam@ucsd.edu](mailto:kadam@ucsd.edu)

43

44

45 **Abstract**

46 To find important objects, we must focus on our goals, ignore distractions, and take our  
47 changing environment into account. This is formalized in models of visual search whereby  
48 goal-driven, stimulus-driven and history-driven factors are integrated into a priority map  
49 that guides attention. History is invoked to explain behavioral effects that are neither  
50 wholly goal-driven nor stimulus-driven, but whether history likewise alters goal-driven  
51 and/or stimulus-driven signatures of neural priority is unknown. We measured fMRI  
52 responses in human visual cortex during a visual search task where trial history was  
53 manipulated (colors switched unpredictably or repeated). History had a near-constant  
54 impact on responses to singleton distractors, but not targets, from V1 through parietal  
55 cortex. In contrast, history-independent target enhancement was absent in V1 but  
56 increased across regions. Our data suggest that history does not alter goal-driven search  
57 templates, but rather modulates canonically stimulus-driven sensory responses to create  
58 a temporally-integrated representation of priority.

59 **Introduction**

60 At any moment we can selectively attend only a small fraction of available  
61 perceptual inputs due to a limited processing capacity, and the world around us is  
62 constantly changing. When performing visual search, we thus need to enhance relevant  
63 information, discard irrelevant information, and keep track of our changing surroundings.  
64 For example, when searching for sea glass at the beach, irrelevant but salient information  
65 (e.g., a red plastic bottle-cap) may grab our attention. But, if we repeatedly encounter the  
66 same irrelevant information (e.g., the beach is littered with red bottle-caps), then we can  
67 learn to ignore initially salient distractors.

68 Models of visual search hypothesize that we integrate information about what is  
69 relevant (*goal-driven* or *'top-down'* factors), what is salient given local image statistics  
70 (*stimulus-driven* or *'bottom-up'* factors), and what has occurred in the past (*history-driven*  
71 *factors*) via an integrated, topographically organized "priority map"<sup>1-6</sup>. Note, some work  
72 uses the terms 'saliency' and 'priority' interchangeably, whereas other work uses these  
73 terms to refer to distinct concepts. Here, we use 'priority' to refer to the integration of goal-  
74 driven and stimulus-driven task factors, and 'saliency' to refer to strictly to image-  
75 computable, stimulus-driven task factors<sup>4</sup>.

76 Although both stimulus-driven and goal-driven information is represented to some  
77 extent in many cortical regions<sup>4,7-11</sup>, areas of parietal cortex (e.g., LIP, IPS) are  
78 hypothesized to be ideal candidates for integrating information about stimulus-driven  
79 sensory inputs from occipital cortex and information about goals from pre-frontal cortex<sup>12-  
80 15</sup>. In contrast to goal-driven and stimulus-driven effects, history-driven effects have only  
81 recently been added to models of visual search, in part because these effects do not  
82 wholly fit within a 'goal-driven' versus 'stimulus-driven' dichotomous framework<sup>1,16-18</sup>.  
83 Rather, history-driven effects apparently rely upon the relationship between the current  
84 sensory input and knowledge of prior experiences. Much work has demonstrated how  
85 canonically 'goal-driven' and 'stimulus-driven' task manipulations alter neural activity in  
86 occipital and parietal cortex (i.e., selective attention<sup>7,10,11,19-25</sup> and stimulus-driven  
87 salience maps<sup>3,26,27</sup>, respectively), but an open question is whether stimulus history  
88 influences attentional priority by co-opting elements of these computations.

89           Some accounts of history-driven effects predict that we exploit existing goal-driven  
90 selection mechanisms to incorporate information about history-driven task factors into  
91 priority maps. For example, when looking for a particular target, one may form a  
92 “template” of that feature and use this template to voluntarily up-regulate relevant portions  
93 of the visual field by co-opting goal-driven selective attention<sup>28–33</sup>. Thus, one possibility is  
94 that history-driven effects (e.g., repetition of target color) may strengthen the target  
95 template, and this increased goal-driven guidance would result in greater activation of the  
96 target position in a priority map. Likewise, if a particular distractor feature is repeated, one  
97 may form an analogous “negative template” for ignoring this feature<sup>34–37</sup> (but see<sup>38,39</sup>).  
98 However, not all evidence supports the notion that history-driven effects can be  
99 implemented via goal-driven selective attention<sup>40–44</sup>. Rather, integrating history into  
100 priority may exploit canonically ‘stimulus-driven’ mechanisms that are encapsulated  
101 within local sensory circuits (e.g., modulation of stimulus-driven saliency maps via  
102 adaptation<sup>45,46</sup>, habituation<sup>42–44</sup> and/or repetition suppression<sup>47,48</sup>). Of course, these  
103 possibilities are not mutually exclusive. For example, distractor and target processing  
104 seem to be differentially affected by history<sup>49–52</sup>. Therefore, it may be that history-driven  
105 changes to priority are reflected in a combination of traditionally ‘goal-driven’ and  
106 ‘stimulus-driven’ neural signatures of priority. Alternatively, history-driven effects may also  
107 be coded via another pathway, such as via implicit and/or explicit learning of regularities  
108 within the medial-temporal lobe<sup>13,53,54</sup>.

109           To test how stimulus history modulates priority, we measured neural activity via  
110 fMRI in human subjects performing a visual search task. If stimulus history influences  
111 search by altering the specificity of the goal-driven target template, then we would expect  
112 to see an enhanced representation of the target item’s position, and this effect should be  
113 most pronounced in regions that are also most influenced by goal-driven selective  
114 attention such as IPS0. However, if stimulus history influences search by influencing  
115 canonically stimulus-driven sensory activity, then we would expect to see a decreased  
116 representation of the salient distractor’s position, and this effect should be pronounced in  
117 areas most influenced by stimulus-driven salience such as V1. We thus estimated the  
118 strength of target and distractor representations in a 4-item search array across

119 retinotopically-defined visual cortical regions. Critically, we manipulated trial history such  
120 that we could compare neural responses to physically identical displays (e.g., green  
121 target, red singleton distractor) as a function of trial history (i.e., whether the colors of  
122 preceding displays repeated or varied).

123 To preview the results, we found that trial history modulated model-based  
124 estimates of distractor suppression, but not target enhancement, in retinotopically-defined  
125 visual areas. Furthermore, we found that visual regions were differentially modulated by  
126 goal-driven target enhancement and by history-driven distractor suppression. Whereas  
127 goal-driven modulations to population codes (i.e., target enhancement) were absent in  
128 V1 and were amplified across the visual hierarchy, history-driven effects were robust in  
129 V1 and across all other examined ROIs. Overall, the data suggest a dissociation between  
130 canonical ‘goal-driven’ mechanisms of attentional priority and ‘history-driven’ effects on  
131 distractor processing. We discuss our findings in the context of ‘stimulus-driven’ saliency  
132 models of V1, whereby history-driven task factors may directly modify priority within  
133 canonically stimulus-driven saliency maps, which integrate neural activity across trials as  
134 well as within a given trial, without the need for a ‘goal-driven’ template of the incidentally  
135 repeated information.

## 136 Results

### 137 Behavior

138 Subjects performed a variant of the additional singleton search task<sup>55</sup> (Figure 1A)  
139 in which they searched for a target (diamond) among non-targets (circles). On each trial,  
140 the participant reported via button-press the orientation of the line inside the diamond  
141 target (vertical or horizontal). On 66.67% of trials, one of the non-targets was uniquely  
142 colored (“singleton distractor present”, e.g., one red distractor, two green non-targets, and  
143 one green target item). Behavioral capture was quantified as slowed response times  
144 (RTs) when the distractor was present versus absent. In addition to examining the basic  
145 capture effect, a key goal of this work was to examine modulation of capture by trial  
146 history<sup>56–58</sup>. Prior work has shown that participants can learn to suppress a distractor (i.e.,  
147 no RT difference for singleton distractor present versus absent trials) when the same  
148 distractor color or distractor location is repeated over many trials<sup>56–58</sup>. Building on this

149 work, we included two key task conditions in a counterbalanced, block-wise fashion to  
150 manipulate trial history and behavioral capture while using identical stimulus arrays (e.g.,  
151 green target, red distractor). In the color constant condition (Figure 1A), the array colors  
152 stayed constant throughout the block (e.g., green target, green non-target items, red  
153 distractor). In the color variable condition (Figure 1B), the array colors randomly varied  
154 from trial to trial. Based on prior work, we expected robust capture in the color variable  
155 condition, and little or no capture in the color constant condition<sup>56–58</sup>.

156

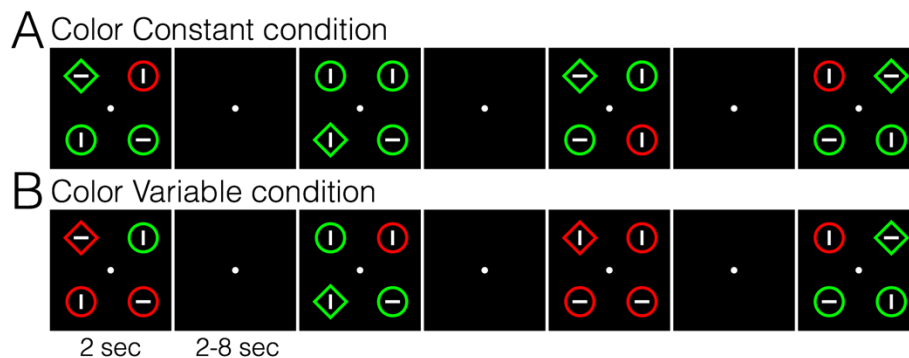

157

158 **Figure 1. Visual search task stimuli.** On each trial, participants viewed a 4-item array  
159 and reported the orientation of the line inside the diamond-shaped target (horizontal or  
160 vertical). **(A)** In the color constant condition, colors of targets and singleton distractors  
161 were fixed throughout the run. **(B)** In the color variable condition, colors of targets and  
162 singleton distractors swapped randomly from trial to trial.

163

164 Replicating prior work, we found significant behavioral capture that was modulated  
165 by trial history<sup>40,41,50,56–59</sup>. In our MRI sample (Exp 1a), we observed significant behavioral  
166 capture in the color variable condition, with longer RT's for distractor present versus  
167 distractor absent trials ( $M = 32.8$  ms,  $SD = 25.5$  ms,  $p = .001$ ,  $d = 1.28$ ), but capture was  
168 not significant in the color constant condition ( $M = 10.8$  ms,  $SD = 18.5$  ms,  $p = .07$ ,  $d =$   
169  $.59$ ). Importantly, capture was significantly larger for color variable vs. color constant runs  
170 ( $p = .009$ ,  $d = .91$ ). We replicated this pattern of findings in the behavior-only experiment  
171 (Exp. 1b), with robust capture for 'color variable' ( $p < 1 \times 10^{-5}$ ,  $d = 1.31$ ), no significant  
172 capture for 'color constant' ( $p = .1$ ,  $d = .32$ ), and larger capture for color variable vs.  
173 constant ( $p = .002$ ,  $d = .71$ ). Participants in both experiments were accurate overall  
174 (>90%), and there was no evidence of a speed-accuracy trade-off (Analysis S1).

175 In addition to the key modulation of capture as a function of stimulus history, we  
176 also replicated prior findings that the degree of capture is significantly modulated by the  
177 physical distance between the target and the distractor<sup>41,49,60,61</sup>, with larger capture for  
178 distractors nearer the target (Figure 2E-F). We ran a repeated measures ANOVA  
179 including both experiments (n=36). Including Experiment as a factor revealed no  
180 experiment main effects or interactions ( $p > .2$ ), so the two experiments were combined  
181 for further analyses of the behavioral data (although Figure 2 shows data from the two  
182 experiments separately). There was a significant effect of Condition (larger capture for  
183 color variable than color constant),  $p < 1 \times 10^{-4}$ , a main effect of Distance (larger capture  
184 for 90° than 180°),  $p = .037$ ,  $\eta^2_p = .12$ , and an interaction between Condition and Distance  
185 (greater distance effect in the color variable condition),  $p = .014$ ,  $\eta^2_p = .16$ .  
186

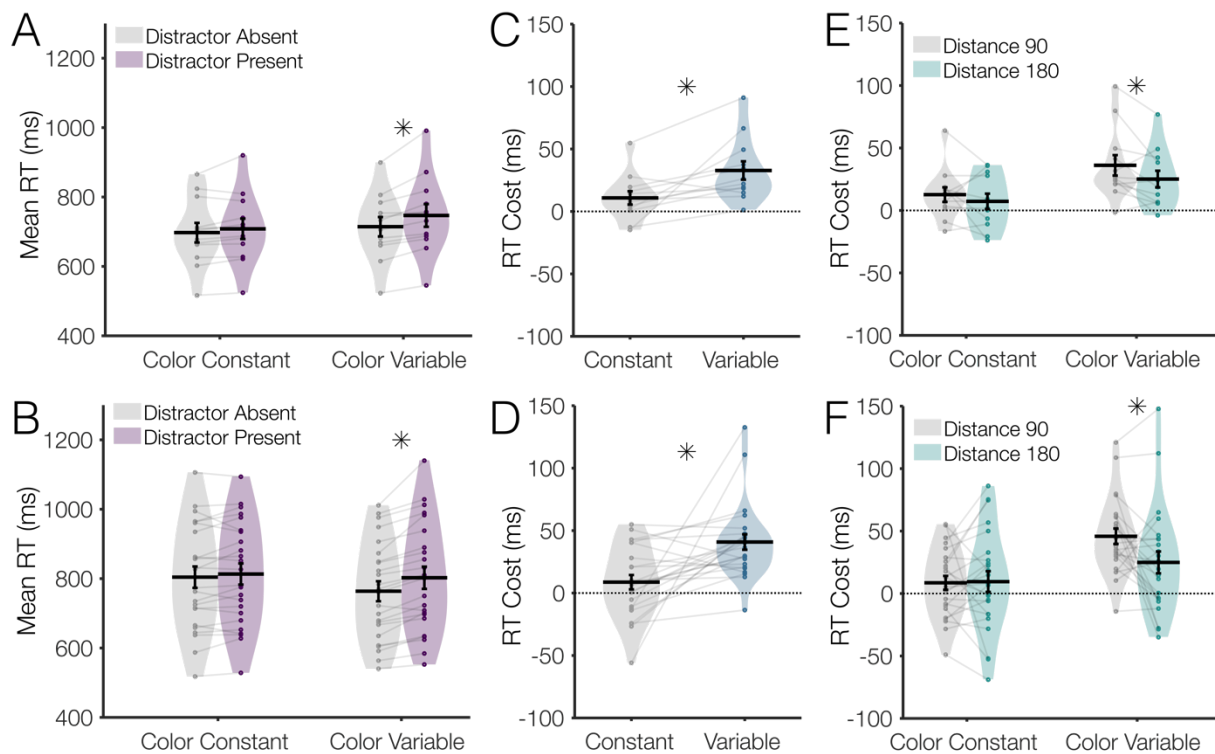

187

188 **Figure 2. Behavioral capture during the visual search task. (A)** In the main MRI  
189 Experiment (Exp 1a), participants were significantly captured by the salient singleton  
190 distractor in the color variable condition, but not in the color constant condition. **(B)** This  
191 pattern replicated in the behavior-only experiment (Exp 1b). **(C-D)** Capture costs (RT  
192 Difference for distractor present – absent trials) were significantly larger in the color  
193 variable than in the color constant condition in Exp 1a **(C)** and Exp 1b **(D)**. **(E-F)** Capture



194 costs (RT Difference for distractor present – absent trials) were significantly modulated  
195 by the distance between the target and distractor in the color variable condition both in  
196 Exp 1a (**E**) and Exp 1b (**F**). Violin plot shading shows range and distribution of the data;  
197 dots represent single subjects; black error bars indicate  $\pm 1$  SEM.  
198

### 199 **fMRI results: Model estimates of spatial position in the independent mapping task**

200 We opted for a multivariate model-based approach to estimate the amount of  
201 information encoded in voxel activation patterns about each of the 4 stimuli in the search  
202 array, as such multivariate approaches are more sensitive than just computing the  
203 univariate mean response across all voxels<sup>62–67</sup>. For example, item-specific information  
204 has been observed using multivariate methods even in the absence of univariate  
205 changes<sup>68,69</sup> (but for univariate analyses of the present data, see Figure S1). We opted  
206 for an inverted encoding model (IEM) approach<sup>70,71</sup>, as opposed to Bayesian or other  
207 decoders<sup>72,73</sup>, because this approach allowed us to easily derive a separate estimate of  
208 the information encoded about each of the 4 simultaneously presented items from the  
209 search array in the main analysis<sup>70</sup>.

210 In our key analyses of the fMRI data, we used an independent mapping task to  
211 train a model of spatial position from which we estimated the relative priority of all item  
212 positions within the visual search array. During the independent mapping task, observers  
213 viewed a flickering checkerboard wedge that was presented at 1 of 24 positions on an  
214 imaginary circle around fixation (Figure 3A). We first checked that we observed robust  
215 estimates of spatial position when training and testing within the independent mapping  
216 task (leave 1 run out, see section ‘Inverted Encoding Model’). We observed robust model-  
217 based estimates of spatial position for all ROIs (Figure 3B). Parameters from the best-  
218 fitting von Mises distribution to each region-of-interest (ROI) are depicted in Figure 3C  
219 (model fits are shown in Figure S2). There was an effect of ROI on precision such that  
220 spatial position was represented less precisely in later visual areas ( $p < 1 \times 10^{-5}$ , where  
221 precision is the concentration parameter  $\kappa$  of the best fitting von Mises, with higher values  
222 indicating a more precise function). There was also an effect of ROI on the amplitude and  
223 baseline measures of the model-based estimates of spatial position ( $p < 1 \times 10^{-5}$ ), and all  
224 3 parameters significantly differed from zero across all ROIs ( $p < 1 \times 10^{-5}$ ). These results,



225 particularly the observation of amplitudes greater than 0, confirmed that activation  
226 patterns in all examined regions encode information about spatial position.

227

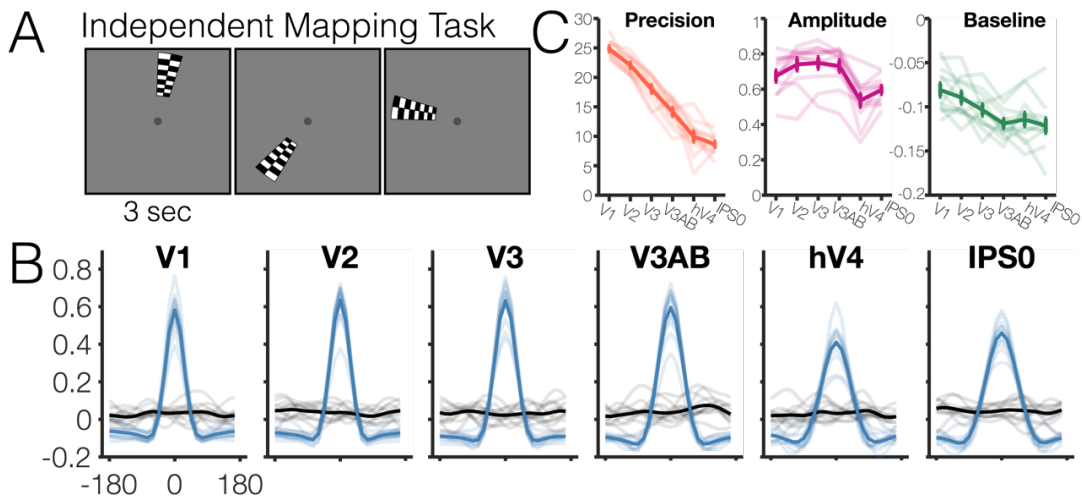

228

229 **Figure 3. Single-item model estimates training and testing within the independent**  
230 **mapping task. (A)** Independent mapping task used to train the model to estimate spatial  
231 position of 4 search array items. Participants viewed a flickering checkerboard which  
232 could appear at one of 24 positions around an imaginary circle. **(B)** Blue lines: Model  
233 estimates of viewed spatial position training and testing within the independent mapping  
234 task. Single-trial model estimates for each subject are aligned to 0 degrees and averaged.  
235 Black lines: Model estimates for shuffled training labels. Opaque lines = group average;  
236 semi-transparent lines = individual subjects. **(C)** Descriptive statistics for best fit von Mises  
237 parameters (precision [ $\kappa$ ], amplitude, baseline) to model estimates in panel B. Error bars  
238 indicate  $\pm 1$  SEM; the opaque line shows the group average; semi-transparent lines show  
239 individual subjects.

240

241 Unlike the single item model estimates that were derived based on the  
242 independent mapping task (Figure 3), we could not fit a simple, uni-modal Gaussian  
243 function to model-based estimates derived from the search task data because 4 peaks in  
244 the model output were expected – one for each item in the search array. As such, we first  
245 conducted simulations to ensure that we would be able to measure putative changes to  
246 individual item representations (e.g. target enhancement, distractor suppression), despite  
247 multiple item representations contributing to the aggregate 4-item model estimates. To  
248 do so, we used data from the independent mapping task to generate predictions for  
249 observed model responses in a 4-item array. For each ROI, we took the 1-item model

250 response derived from the independent mapping task, replicated this model response  
251 four times (once at each of the four search array positions), and took the average of all 4  
252 shifted 1-item model response lines to generate a single 4-item model prediction. In  
253 addition, we systematically varied the strength of the simulated response to each item to  
254 ensure that we were able to recover a corresponding change in the item-specific  
255 responses estimated from the aggregate 4-item model estimate (Figure 4; Figure S3).

256         These simulations revealed clearly separable peaks for all four items in early areas  
257 like V1, where spatial precision is high (Figure 4A-B, left panel). In contrast, identifying  
258 clear peaks in later areas like IPS0 was difficult when the response to all items was  
259 equivalent (Figure 4A-B, right panel). However, if one item evoked a larger or smaller  
260 response than the other items, as would be expected with target enhancement or  
261 distractor suppression, then clear and measurable changes to the aggregate 4-item  
262 model estimates emerged (Figure 4C). Further simulations showed that we could detect  
263 smaller changes to one item (e.g., distractor suppression) in the presence of larger  
264 changes to another item (e.g., target) by measuring the response amplitude at each  
265 expected item's peak. In V1, this is clearly seen in the peak response to each item; in  
266 later areas such as IPS0, such changes manifest as a large central peak that is skewed  
267 by the neighboring items' smaller changes (Figure 4D).

268         We also used a general linear model (GLM) to estimate best-fitting gain factors for  
269 each of the 4 hypothesized item representations by fitting an aggregate function and  
270 allowing one parameter in the GLM to scale the response associated with each item. This  
271 is essentially the inverse of the simulations described above: For a given aggregate  
272 response (i.e., the response of each of the 24 spatial channels when shown a given 4-  
273 item search array), we used a non-negative least squares solution<sup>74</sup> to estimate the  
274 contribution of each of the 4 item positions (calculated from the 1-item localizer task) to  
275 the observed 4-item search array response (Figure 4E). This analysis yielded similar  
276 results to the simple approach of comparing the height at each expected item peak (e.g.,  
277 Analysis S2-4). Thus, using either the raw amplitude at expected peaks or a GLM-based  
278 approach, we determined that we should be able to accurately characterize situations in

279 which there was no modulation of target and distractor responses as well as situations in  
280 which there was a significant modulation of target and/or distractor responses.  
281

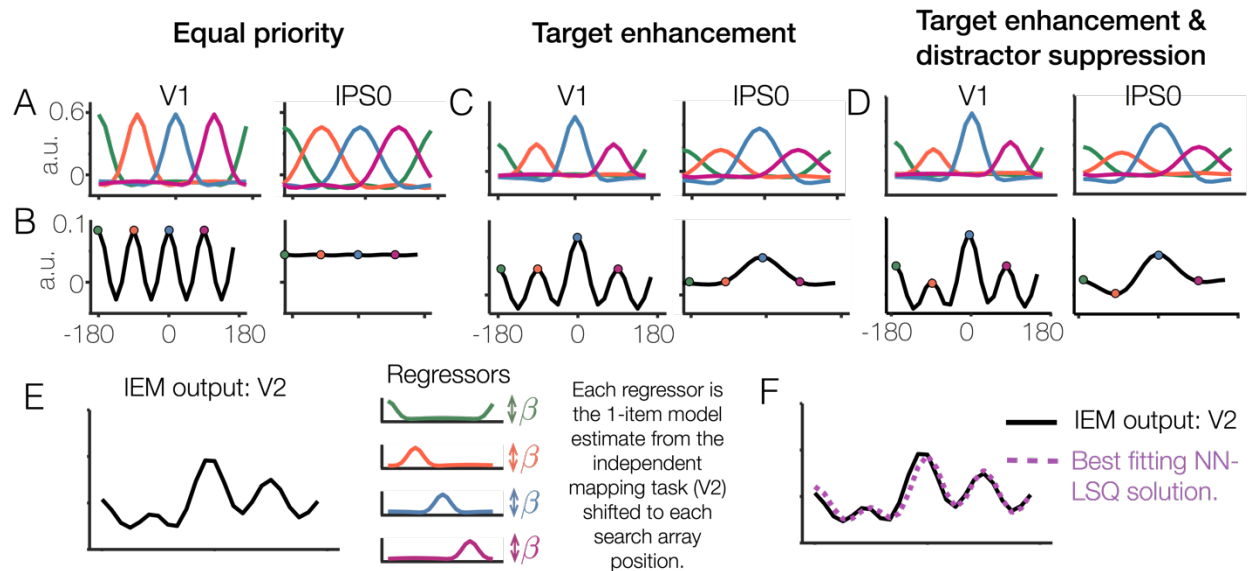

282

283 **Figure 4. Generating predictions for 4-item model estimates by averaging single-**  
284 **item model estimates from the independent mapping task. (A)** Average from the  
285 independent mapping task plotted at 4 hypothetical item locations. Here, these 4 “items”  
286 are represented with equal priority. (B) Hypothetical observed response when measuring  
287 a single trial containing the 4 items presented simultaneously. This line is the average of  
288 all lines in Panel A. (C) The same as panels A and B, but with the item at position 0  
289 assigned a higher response amplitude than the other three items. (D) The same panels  
290 as A and B, but with both an enhanced item at position 0 and a suppressed item at position  
291 -90. (E) Actual IEM model output for 4-item search arrays in V2 (Target plotted at 0,  
292 distractor plotted at -90). To estimate the strength of each of the 4 underlying item  
293 representations, one can simply measure the height (a.u.) at expected item peaks (i.e., -  
294 180, -90, 0, and 90). Alternatively, one may use a non-negative least squares solution  
295 to estimate weights for a regressor for each of the 4 item positions. Each regressor is the 1-  
296 item IEM output from the independent mapping task within the same region (e.g., V2),  
297 shifted to the appropriate item location. (F) Example IEM output and best-fitting non-  
298 negative least squares solution with 4 item regressors.  
299

### 300 **Analysis of search array locations in V1, V2, V3, V3AB, hV4, and IPS0.**

301 Given that we can assess differential responses associated with each of the 4  
302 items in the search array (Figure 4), we next tested whether goal- and history-driven  
303 modulations were differentially represented across the visual stream by performing an  
304 analysis of history-driven effects on target and distractor processing across visual ROIs

305 (Figure 5). These six ROIs (V1, V2, V3, V3AB, hV4 and IPS0) were chosen for each  
306 participant having at least 90 spatially selective voxels as determined by the localizer  
307 data. Here, we focus on history-driven effects on target processing and distractor  
308 processing for the arrays where behavioral and neural distractor competition effects were  
309 greatest (target-distractor separation  $\pm 90^\circ$ , see Figure 2E,F). Full ANOVA results and  
310 additional plots are shown for individual ROIs with both array  $90^\circ$  and  $180^\circ$   
311 configurations in Figure S7-8 and Analysis S5.

312

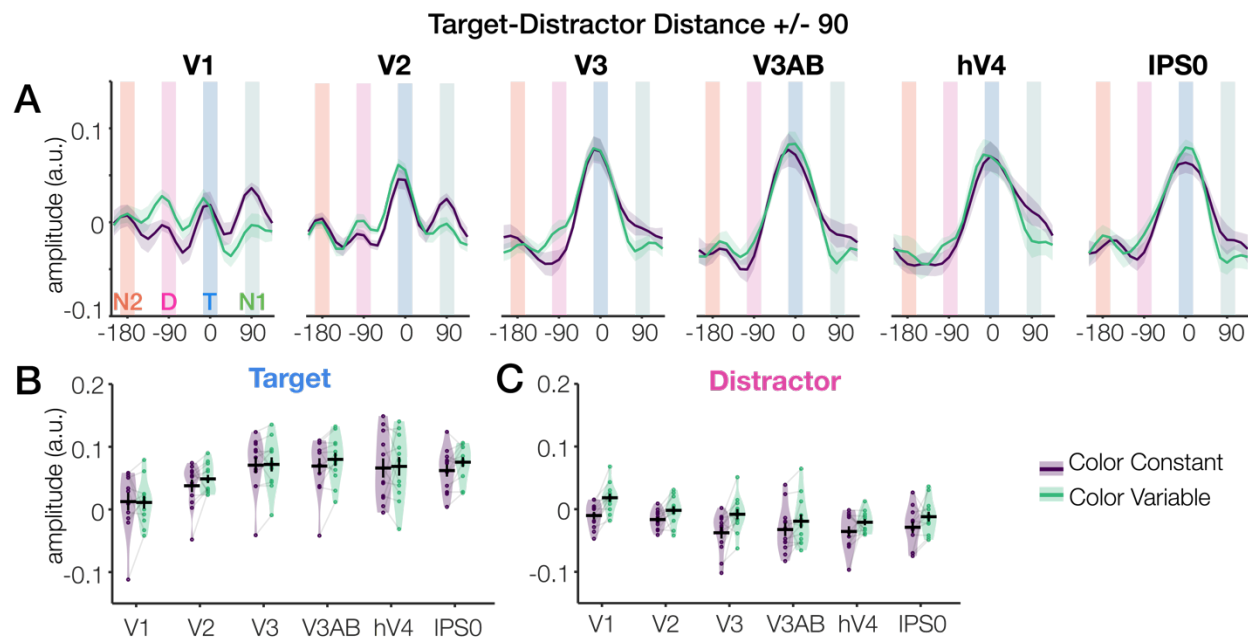

313

314 **Figure 5. Dissociable effects of stimulus history on target enhancement and**  
315 **distractor suppression.** (A) Model responses for individual ROIs as a function of task  
316 condition (Arrays with target-distractor distance  $\pm 90^\circ$ ). Purple and green lines (Shaded  
317 error bars = 1 SEM) show the output of the inverted encoding model in the color constant  
318 and color variable conditions, respectively. Target enhancement can be seen as the  
319 greater height at position 0; history-driven distractor suppression can be seen as the lower  
320 height at position -90 for the purple vs. green line. Background panels at  $-180^\circ$ ,  $-90^\circ$ ,  $0^\circ$   
321 and  $+90^\circ$  show the positions of the 4 search array items (blue = target (T), pink = distractor  
322 (D), green = non-target 1 (N1), orange = non-target 2 (N2), (B) Target amplitude as a  
323 function of ROI and task condition. There was no effect of task condition on target  
324 amplitude, but a significant increase in target amplitude across ROIs. Violin plot shading  
325 shows range and distribution of the data; dots represent single subjects; black error bars  
326 indicate  $\pm 1$  SEM. (C) Distractor amplitude as a function of ROI and task condition. There  
327 was a significant effect of task condition on distractor amplitude, and this history-driven  
328 effect did not interact with ROI.

329

330 We found evidence for within-display target enhancement (i.e., enhancement of  
331 the target over other positions), but we did not find evidence for history-driven  
332 modulations of target enhancement. Overall target enhancement was significant in all  
333 ROIs (all  $p$ 's < .001) except for V1 ( $p$ 's > .12), and target enhancement significantly  
334 increased across ROIs ( $p$  < .001) as shown in Figure 6A-B. There was, however, no  
335 meaningful effect of history on target amplitude as revealed by a repeated-measures  
336 ANOVA testing the main effect of history and the interaction between history and ROI on  
337 target processing ( $p = .35$ ,  $\eta^2_p = .08$ ;  $p = .64$ ,  $\eta^2_p = .04$  for main effect and interaction  
338 respectively). This pattern was the same whether we used raw amplitude values or we  
339 used values from the GLM (no effect of history,  $p = .28$ , no interaction of history and ROI,  
340  $p = .51$ ).

341 In contrast, history had a significant effect on distractor amplitude such that  
342 distractor amplitudes were significantly attenuated in the color constant condition relative  
343 to the color variable condition. A repeated-measures ANOVA revealed a main effect of  
344 history ( $p = .007$ ,  $\eta^2_p = .50$ ) and no interaction between history and ROI ( $p = .44$ ,  $\eta^2_p =$   
345  $.08$ ), indicating that the effect of history on distractor processing was similar throughout  
346 the examined ROIs. Though the ANOVA suggests that history effects were of a similar  
347 magnitude across all examined ROIs, a post-hoc simple main effects analysis showed  
348 that the effect was individually significant only in V1 ( $p$  < .001) and V3 ( $p$  < .01). This  
349 general pattern was the same whether we used raw amplitude values or else used values  
350 from the GLM approach (main effect of history,  $p = .01$ ,  $\eta^2_p = .47$ , no interaction of history  
351 and ROI,  $p = .87$ ,  $\eta^2_p = .03$ ).

352 Finally, we examined changes in non-target responses. For “non-target 1” (the item  
353 neighboring the target on the side opposite the distractor), there was an overall history  
354 related modulation (color constant > color variable,  $p = .016$ ,  $\eta^2_p = .42$ ) that did not interact  
355 with ROI ( $p = .76$ ,  $\eta^2_p = .03$ ). Similar general effects on non-target processing have been  
356 observed recently<sup>51</sup> and may reflect a bias of attention away from the distractor such that  
357 attention may ‘overshoot’ the target because of the reduction in signal at the distractor  
358 location. The effect of history on “non-target 1” responses likewise was similar though of

359 borderline significance in the GLM analysis (color constant > color variable,  $p = .049$ ,  $\eta^2_p$   
360 = .31). We found no effect of history on the other non-target (“non-target 2”) which  
361 occupied the spatial position 180 degrees from the target item ( $p \geq .61$ ).

362 Finally, additional analyses on larger, aggregate ROIs (V1-V3, IPS0-3) yield  
363 convergent results and also demonstrate how distractor suppression effects were absent  
364 for arrays where the target and distractor did not compete with each other (target-  
365 distractor separation +/- 180°), consistent with our separate analysis of each ROI (Figure  
366 6) and prior behavioral and neural findings<sup>41,49,51,60</sup> (Analysis S2-4, Figures S4-6).

367

368

### Discussion

369 To find what we are looking for, we must integrate information about stimulus  
370 relevance, salience, and history. While the impact of stimulus relevance and salience on  
371 topographically organized population codes have been thoroughly investigated, stimulus  
372 history is not thought to be a wholly goal-driven or stimulus-driven process as history  
373 effects depend on interactions between the current stimulus drive (‘bottom-up’ factor) and  
374 the current internal state of the visual system (‘top-down’ factor). To address this  
375 ambiguity and to better understand how history impacts visual processing, we tested  
376 whether history-driven changes to attentional priority operate in a manner akin to  
377 canonically goal-driven and/or to stimulus-driven signatures of priority. To do so, we  
378 estimated population-level neural responses evoked by 4-item search arrays across  
379 retinotopically-defined areas of occipital and parietal cortex. We found that stimulus  
380 history did not modulate the specificity of goal-driven target templates, as goal-driven  
381 target enhancement was unaffected by stimulus history. Instead, we found that stimulus  
382 history attenuated responses related to distractors throughout the visual hierarchy. These  
383 results suggest that stimulus history may influence visual search performance via local  
384 competitive interactions within early sensory cortex (i.e., V1).

385 Traditional models of image-computable salience propose that local image  
386 statistics determine competitive interactions that give rise to 2D spatial salience maps  
387 within V1<sup>26,27</sup>, and these models do not typically account for the effects of stimulus history.  
388 However, recent work suggests that neural adaptation – which is linked to the history of



389 prior stimuli – in a subset of tuned neurons may alter stimulus-driven competitive  
390 dynamics (e.g., divisive normalization<sup>75</sup>) within early visual cortex<sup>76</sup>. Thus, to  
391 accommodate our observation of history-driven distractor suppression within existing  
392 saliency models, we propose that stimulus-driven evoked responses may be integrated  
393 over a longer, multi-trial duration (as opposed to just within a single image; Figure 6)<sup>77–79</sup>.  
394 In the context of models of visual search, this might be comprised of a series of 2D spatial  
395 maps that together form a temporally integrated 3D saliency map (i.e., saliency is  
396 computed based on current and prior physical stimulus properties). Consistent with the  
397 notion of a 3D saliency map, recent behavioral and neural evidence suggests a role for  
398 priming and habituation in visual search behaviors<sup>42–44,50,80</sup> (also see<sup>81</sup>).

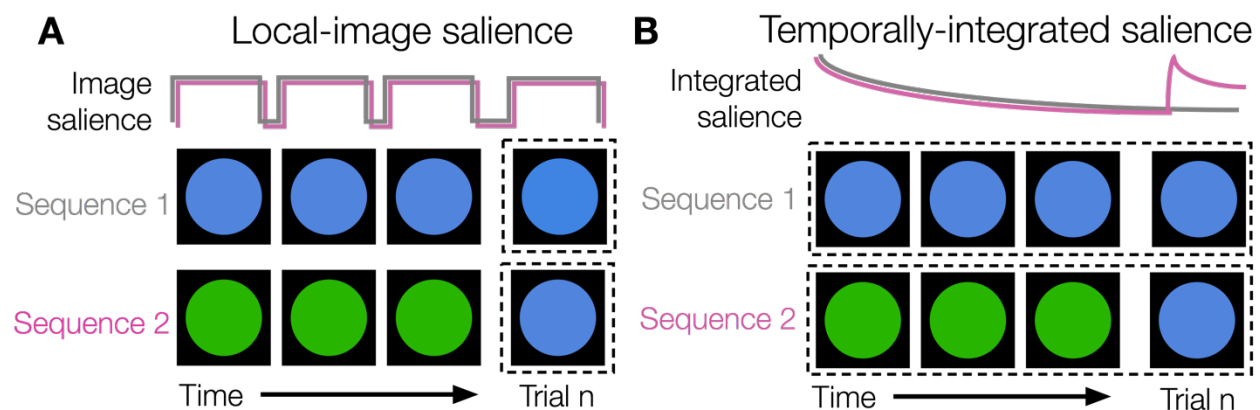

399

400 **Figure 6. Simplified cartoon illustration of local-image versus temporal-integration**  
401 **saliency for a simple image with one feature and location.** (A) In 2-D saliency  
402 computations, stimulus-driven stimulus drive is determined locally within a given image  
403 without respect to prior images. Sequence 1 is 4 different trials, and on each trial the  
404 same stimulus is shown (Blue-Blue-Blue-Blue). Sequence 2 is 4 different trials, but the  
405 final trial is a different color from the preceding trials (Green-Green-Green-Blue). The final  
406 trial (Blue) is physically identical for the two sequences. So, the final stimuli (trial  $n$  in each  
407 sequence) have identical 2-D saliency. Assuming that we chose equiluminant green and  
408 blue values, then each “frame” in the sequence likewise has approximately the same  
409 image-computable saliency, as shown by the uniform-sized square pulses in the cartoon.  
410 (B) Alternatively, stimulus-driven saliency maps may better be conceived of as reflecting  
411 a temporally-integrated 3-D saliency map, as early sensory neurons adapt to ongoing  
412 stimulus features. In Sequence 1 (Blue-Blue-Blue-Blue), the activity of neurons that are  
413 maximally responsive to blue wanes due to adaptation. In Sequence 2 the activity of  
414 neurons maximally responsive to green wanes over the first 3 trials, but the final stimulus  
415 elicits a robust response from the non-adapted blue-preferring neurons. Thus, temporally-  
416 integrated saliency for the trial  $n$  in each sequence differs across the two sequences even  
417 though the stimuli are physically identical.



418 Consistent with a temporally-integrated salience account of history-driven  
419 distractor suppression, we observed history-driven modulations only with sufficient  
420 competition (i.e., targets and distractors were closer together) and we observed robust  
421 history-driven modulations in V1 in the absence of goal-driven modulations. In line with  
422 our findings, prior behavioral work has shown that incidental repetitions of distractor, but  
423 not target, features and locations modulate search performance<sup>49,50</sup>. Likewise, prior work  
424 has shown a rapid suppression of distractor-evoked neural responses<sup>56,57,82–86</sup> and that  
425 the likelihood of distraction results in anticipatory changes to distractor, but not target,  
426 locations<sup>51,87,88</sup>. However, the proposed temporally-integrated salience account does not  
427 capture all history-driven effects. In our task, the repeated distractor features were purely  
428 visual in nature, and thus history effects might be mediated entirely via local circuit  
429 dynamics (i.e., the adaptation account described above). In contrast, other studies have  
430 examined history-driven effects for more abstract features like reward<sup>10,19,89–95</sup> (but also  
431 see<sup>96,97</sup>), which may require an intermediary pathway such as the medial-temporal lobe<sup>13</sup>  
432 or dopaminergic midbrain structures<sup>89,98</sup>.

433 In addition to implicating early visual cortex in representing history-driven task  
434 factors during visual search, we also replicated prior findings that the locations of attended  
435 items (here, search targets) are prioritized relative to other item locations in both visual  
436 and parietal cortex<sup>7,8,10</sup>. These target-related modulations are consistent with the broad  
437 involvement of visually-responsive regions in representing goal-driven priority during  
438 visual search<sup>19,25</sup>. For example, recent studies manipulated the salience (contrast) and  
439 relevance (attended or unattended) of items and found that salience and relevance were  
440 both represented, to varying degrees, across the visual hierarchy<sup>8,20</sup>. Notably, however,  
441 here we found that target prioritization was absent in V1, whereas prior work has found  
442 robust effects of attention in V1<sup>7,10,11,21–24,99,100</sup>. This difference may reflect task  
443 differences — much prior work found attention-related gains in V1 when spatial attention  
444 was cued in advance or a single target was shown, whereas visual search arrays provide  
445 visual drive at many competing locations and spatial attention is deployed only after array  
446 onset. In addition, our work suggests that further work may be needed to unconfound  
447 history effects and attention effects in the study of spatial attention, as much early work

448 on univariate attention effects has employed blocked designs where the same location is  
449 attended for many trials in a row<sup>21,22,24,99,100</sup>.

450 Although our work suggests that stimulus history modulates representations of  
451 distractor but not target processing in visual cortex, there are some potential limitations  
452 to the current design that suggest avenues for future work. First, because we measured  
453 only location, we could not directly measure suppression of the distractor color<sup>40</sup>.  
454 However, as the spatial position of the distractor was completely unpredictable, our  
455 results do strongly imply that the distractor color was suppressed. Likewise, most theories  
456 of visual search hypothesize that space is the critical binding medium through which  
457 feature and goal maps are integrated<sup>3,5,6</sup>, and recent work suggests that location is  
458 spontaneously encoded even when only non-spatial features such as color are task-  
459 relevant<sup>101</sup>. Second, it is possible that history may modulate both distractor- and target-  
460 processing in other circumstances not tested here. That is, perhaps the target template  
461 ‘diamond’ in our task was sufficiently useful such that adding feature information to this  
462 template (e.g., ‘red diamond’ rather than ‘diamond’) did not confer a behavioral advantage  
463 (but see<sup>102</sup>). Finally, the time-course of MRI (sampling every 800 ms) is slower than shifts  
464 of spatial attention to the search target (< 500 ms)<sup>103</sup>. Although the history-driven effects  
465 that we observed in visual cortex are consistent with the rapid distractor suppression  
466 effects observed in EEG<sup>82,83</sup>, we cannot definitively say on the basis of these data that  
467 the observed history-driven effects occurred rapidly and directly within visual cortex  
468 versus via recurrent feedback from later visual areas. Nonetheless, the present work is  
469 consistent with and provides critical initial evidence for such a model.

470

471

## Methods

### 472 Participants

473 **Experiment 1a: MRI experiment.** Healthy volunteers ( $n = 12$ ; 9 female; mean age  
474 = 25.3 years [SD = 2.5, min = 21, max = 30]; all right-handed; normal or corrected-to-  
475 normal visual acuity; normal color vision) participated in three ~2 hour sessions at the  
476 Keck Center for fMRI on the University of California San Diego (UCSD) campus, and were  
477 compensated \$20/hr. Procedures were approved by the UCSD Institutional Review

478 Board, and participants provided written informed consent. Sample size was determined  
479 by a power analysis on data from Sprague et al.<sup>8</sup> where achieved power (1- $\beta$ ) to detect a  
480 within-subjects attention modulation using an inverted encoding model was 83% (across  
481 10 ROIs) with  $n=8$ . We planned for  $n = 11$  to achieve estimated 90% power (rounded up  
482 to  $n = 12$  to satisfy our counter-balancing criteria).

483 **Experiment 1b: Behavior only.** Healthy volunteers ( $n = 24$ ; 21 female; mean age  
484 = 19.8 years [SD = 1.5, min = 18, max = 24]; normal or corrected-to-normal visual acuity;  
485 normal color vision; handedness not recorded) participated in one 1.5-hour experimental  
486 session in the Department of Psychology on the UCSD campus, and were compensated  
487 with course credit. Procedures were approved by the UCSD IRB, and all participants  
488 provided written informed consent. A sample size of 24 was chosen *a priori* based on  
489 published papers<sup>56</sup>.

490

#### 491 **Session procedures**

492 **Exp 1a, Retinotopy session.** Participants completed one retinotopic mapping  
493 session prior to participation in the experimental sessions, following standard  
494 procedures<sup>104,105</sup>. Some participants had already completed a retinotopy session as part  
495 of prior studies in the lab; this session was used if available. Retinotopy data were used  
496 to identify retinotopic ROIs (V1-V3, V3AB, hV4, VO1, VO2, LO1, LO2, TO1, TO2, IPS0-  
497 4). During each session, participants viewed flickering checkerboards. On meridian  
498 mapping runs, a “bowtie” checkerboard alternated between the horizontal and vertical  
499 meridians. On polar angle mapping runs, a checkerboard wedge slowly rotated in a  
500 clockwise or counterclockwise direction. On eccentricity mapping runs, a “donut”  
501 checkerboard began near fixation and its radius slowly expanded outward. A high-  
502 resolution anatomical scan was collected for functional alignment. Anatomical and  
503 functional retinotopy analyses were performed using custom code caling existing  
504 FreeSurfer and FSL functions. Functional retinotopy data were used to draw ROIs, but  
505 only voxels that were also visually responsive to experimental localizers (below) were  
506 analyzed further.

507           **Exp 1a, Main MRI session.** Participants completed two experimental sessions. In  
508 each session, they completed 2 runs of the item position localizer, 4 runs of the spatial  
509 location localizer, and 8 runs of the search task (4 runs “color variable”, 4 runs “color  
510 constant”). When time allowed, extra localizer runs were collected. Some participants also  
511 took part in an unrelated study in which additional localizers were collected.

512           **Exp 1b.** Participants completed 12 blocks of the search task (6 blocks “color  
513 variable”, 6 blocks “color constant”).

514

## 515 **Stimuli and task procedures**

### 516 **Experiment 1a: MRI**

517           Stimuli were projected on a 21.5 x 16 cm screen mounted inside the scanner bore.  
518 The screen was viewed from a distance of ~47 cm through a mirror. Stimuli were  
519 generated in MATLAB (2017b, The MathWorks, Natick, MA) with the Psychophysics  
520 toolbox <sup>106,107</sup> on a laptop running Ubuntu. Responses were collected with a 4-button  
521 button box. Stimuli for each task are shown in Figure 1.

522           **Item position localizer.** Participants viewed reversing checkerboards (4 Hz  
523 flicker) which occupied the locations of the items in the search task (each item radius =  
524 2.5° placed on an imaginary circle 7° from fixation, with one item in each of the 4  
525 quadrants on the circle). Participants were shown items on 2 alternating diagonals (i.e.,  
526 items in Quadrants 1 and 3 and then Quadrants 2 and 4) for 3 sec each. There were 88  
527 stimulus presentations within each run. Participants were instructed to attend to both  
528 items, and to press a button if either item briefly dimmed. A brief (250 ms) dimming  
529 occurred on 1 of the 2 items for 25% of stimulus presentations.

530           **Spatial location localizer.** Participants viewed a reversing checkerboard wedge  
531 (flicker = 4 Hz; white & black checkerboards) at one of 24 positions. Checkerboard  
532 positions were equally spaced along a circle with radius = 7°, and wedges were non-  
533 overlapping (i.e., each wedge’s width along the circle filled a 15° arc and was ~5° of visual  
534 angle in height). The wedge stayed at one position for 3 sec, then moved to a different  
535 position (with the constraint that back-to-back positions must be in different quadrants).  
536 There were 96 wedge presentations within each run. Participants were instructed to

537 attend to the fixation point; if the fixation point's color changed (increase or decrease in  
538 brightness), they pressed a button on the button box. A total of 20 fixation point color  
539 changes occurred throughout each run; changes to the fixation cross happened at  
540 random times with respect to wedge stimulus onsets.

541 **Search task.** Participants performed a variant of the additional singleton search  
542 task (Theeuwes, 1992). On each trial, participants saw a search array containing 4 items  
543 (item colors were red, RGB = 255,0,0, or green, RGB = 0,255,0, and presented on a black  
544 background, RGB = 0,0,0). The items (2.4° radius) were placed on an imaginary circle 7°  
545 from fixation with 1 item in each visual quadrant (i.e., 45°, 135°, 225° & 315°). Participants  
546 fixated a small, gray dot (.2°) throughout each run. Participants searched for a “target”  
547 (the diamond-shaped item) among distractor items and reported the orientation of the  
548 small line inside (line size = .08° x .94°; orientation = horizontal or vertical) by pressing  
549 one of two buttons. Non-singleton distractors, ‘non-targets’, had the same color as the  
550 shape-defined target (e.g., green circles). A “singleton distractor” was present on 66.67%  
551 of trials, and was a color singleton (e.g., red circle). Stimuli are illustrated in Figure 1.  
552 Target location (quadrant 1-4), distractor location relative to the target (-90°, +90°, or  
553 +180°), distractor presence (66.67% present), and the orientation of the line inside the  
554 target (horizontal or vertical) were fully counterbalanced within each run, for a total of 72  
555 trials per run. Search set size was held constant at 4 items. The search array was  
556 presented for 2 sec followed by a blank inter-trial interval (equal probability of 2, 3.2, 5, or  
557 8 sec).

558 We manipulated the degree to which participants were behaviorally captured by  
559 the distractor by changing trial history. In “color variable” runs, the colors of targets and  
560 distractors swapped unpredictably. In “color constant” runs, the colors of targets and  
561 distractors were fixed throughout the run (e.g., the targets and non-singleton distractors  
562 were always green and the singleton distractor was always red). Based on prior work<sup>57,58</sup>,  
563 we expected to observe robust behavioral capture by the singleton distractor in the color  
564 variable runs and no behavioral capture in the color constant runs.

565 Run types were blocked and partially counterbalanced within and across sessions,  
566 such that the order of the 2 conditions would be balanced across the 2 sessions for each

567 participant. For example, if in Session 1 a participant first received 4 color variable runs  
568 followed by 4 color constant runs (red), then in Session 2 they would first receive 4 color  
569 constant runs (green) followed by 4 color variable runs.

570

### 571 **Experiment 1b: Behavior**

572 Participants performed the same additional singleton search task described above.  
573 Participants viewed the stimuli on CRT monitors (39 x 29.5 cm) from a distance of ~52  
574 cm. Stimulus parameters (size, color) and trial timing were matched to the fMRI  
575 experiment. Each experimental block contained a total of 48 search trials. Participants  
576 performed a total of 12 blocks of trials (6 color variable, 3 color constant with red targets,  
577 3 color constant with green targets). The color constant and color variable conditions were  
578 blocked and counterbalanced across participants (half of participants received the color  
579 variable condition first).

580

### 581 **Magnetic resonance imaging acquisition parameters**

582 Scans were performed on a General Electric Discovery MR750 3.0T scanner at  
583 the Keck Center for Functional Magnetic Resonance Imaging on the UCSD campus.  
584 High-resolution (1mm<sup>3</sup> isotropic) anatomical images were collected as part of the  
585 retinotopy session. Most participants' (10 of 12) anatomical images were collected with  
586 an Invivo 8-channel head coil; 2 participants' anatomical images were collected with a  
587 Nova Medical 32-channel head coil (NMSC075-32-3GE-MR750). GE's "Phased array  
588 Uniformity Enhancement" (PURE) method was applied to anatomical data acquired using  
589 the 32-channel coil in an attempt to correct inhomogeneities in the signal intensity.  
590 Functional echo-planar imaging (EPI) data were collected with the Nova 32 channel coil  
591 using the GE multiband EPI sequence, using nine axial slices per band and a multiband  
592 factor of eight (total slices = 72; 2 mm<sup>3</sup> isotropic; 0 mm gap; matrix = 104 × 104; field of  
593 view = 20.8 cm; repetition time/echo time (TR/ TE) = 800/35 ms, flip angle = 52°; in-plane  
594 acceleration = 1). The initial 16 TRs in each run served as reference images for the  
595 transformation from *k*-space to image space. Un-aliasing and image reconstruction  
596 procedures were performed on local servers and on Amazon Web Service servers using

597 code adapted from the Stanford Center for Cognitive and Neurobiological Imaging (CNI).  
598 Forward and reverse phase-encoding directions were used during the acquisition of two  
599 short (17 sec) “top-up” datasets. From these images, susceptibility-induced off-resonance  
600 fields were estimated<sup>108</sup> and used to correct signal distortion inherent in EPI sequences,  
601 using FSL top-up<sup>109,110</sup>.

602

### 603 **Pre-processing**

604 Pre-processing of imaging data closely followed published lab procedures<sup>111</sup> using  
605 FreeSurfer and FSL. We performed cortical surface gray-white matter volumetric  
606 segmentation of the high-resolution anatomical volume from the retinotopy session using  
607 FreeSurfer’s “recon-all” procedures<sup>112</sup>. The first volume of the first functional run from  
608 each scanning session was coregistered to this common T1-weighted anatomical image.  
609 To align data from all sessions to the same functional space, we created transformation  
610 matrices with FreeSurfer’s registration tools<sup>113</sup>, and used these matrices to transform  
611 each four-dimensional functional volume using FSL’s FLIRT<sup>114,115</sup>. After cross-session  
612 alignment, motion correction was performed using FSL’s McFLIRT (no spatial smoothing,  
613 12 degrees of freedom). Voxelwise signal time-series were normalized via Z-scoring on  
614 a run-by-run basis. Analyses after preprocessing were performed using custom scripts in  
615 MATLAB 2018A.

616

### 617 **fMRI analyses: Inverted encoding model**

618 **Voxel selection for Decoding ROIs.** We defined visual ROI’s using data from  
619 the retinotopy session following published lab procedures<sup>7,111</sup>. From these retinotopically-  
620 derived ROI’s, we chose the subset of voxels that were spatially selective for the stimuli  
621 used in this task. We thresholded voxels using the independent mapping task data. We  
622 ran a one-way ANOVA with factor Quadrant on each voxel; significant voxels ( $p < .05$   
623 uncorrected) were retained for analysis. For the aggregate analyses, we *a priori* created  
624 an early visual cortex ROI (all spatially selective voxels from V1-V3) and a parietal cortex  
625 ROI (all spatially selective voxels from IPS0-3). For individual ROI analyses, we used all



626 individual retinotopic ROIs for which there were a minimum of 90 spatially selective voxels  
627 per participant: V1, V2, V3, V3AB, hV4, and IPS0.

628 **Inverted Encoding Model.** Following prior work<sup>7,116</sup>, we used an inverted  
629 encoding model to estimate spatially-selective tuning functions from multivariate, voxel-  
630 wise activity within each ROI. We assumed that each voxel's activity reflects the weighted  
631 sum of 24 spatially selective channels, each tuned for a different angular location. These  
632 information channels are assumed to reflect the activity of underlying neuronal  
633 populations tuned to each location. We modeled the response profile of each spatial  
634 channel as a half sinusoid raised to the 24<sup>th</sup> power:

$$635 \quad R = \sin(0.5\theta)^{24},$$

636 where  $\theta$  is angular location (0–359°, centered on each of the 24 bins from the mapping  
637 task), and  $R$  is the response of the spatial channel in arbitrary units.

638 Independent training data  $B_1$  were used to estimate weights that approximate the  
639 relative contribution of the 24 spatial channels to the observed response at each voxel.  
640 Let  $B_1$  ( $m$  voxels  $\times$   $n_1$  observations) be the activity at each voxel for each measurement  
641 in the training set,  $C_1$  ( $k$  channels  $\times$   $n_1$  observations) be the predicted response of each  
642 spatial channel (determined by the basis functions) for each measurement, and  $W$  ( $m$   
643 voxels  $\times$   $k$  channels) be a weight matrix that characterizes a linear mapping from “channel  
644 space” to “voxel space”. The relationship between  $B_1$ ,  $C_1$ , and  $W$  can be described by a  
645 general linear model:

$$646 \quad B_1 = WC_1$$

647 We obtained the weight matrix through least-squares estimation:

$$648 \quad \widehat{W} = B_1 C_1^T (C_1 C_1^T)^{-1}$$

649 In the test stage, we inverted the model to transform the observed test data  $B_2$  ( $m$  voxels  
650  $\times$   $n_2$  observations) into estimated channel responses,  $C_2$  ( $k$  channels  $\times$   $n_2$  observations),  
651 using the estimated weight matrix,  $\widehat{W}$ , that we obtained in the training phase:

$$652 \quad \widehat{C}_2 = (\widehat{W}^T \widehat{W})^{-1} \widehat{W}^T B_2$$

653 Each estimated channel response function was then circularly shifted to a common center  
654 by aligning the estimated channel responses to the channel tuned for target location.



- 701 18. Van Moorselaar, D. & Slagter, H. A. Inhibition in selective attention. *Annals of the New York Academy*  
702 *of Sciences* **1464**, 204–221 (2020).
- 703 19. Mazer, J. A. & Gallant, J. L. Goal-Related Activity in V4 during Free Viewing Visual Search. *Neuron*  
704 **40**, 1241–1250 (2003).
- 705 20. Poltoratski, S., Ling, S., McCormack, D. & Tong, F. Characterizing the effects of feature salience and  
706 top-down attention in the early visual system. *Journal of Neurophysiology* **118**, 564–573 (2017).
- 707 21. Gandhi, S. P., Heeger, D. J. & Boynton, G. M. Spatial attention affects brain activity in human primary  
708 visual cortex. *Proceedings of the National Academy of Sciences* **96**, 3314–3319 (1999).
- 709 22. Somers, D. C., Dale, A. M., Seiffert, A. E. & Tootell, R. B. H. Functional MRI reveals spatially specific  
710 attentional modulation in human primary visual cortex. *Proceedings of the National Academy of*  
711 *Sciences* **96**, 1663–1668 (1999).
- 712 23. Motter, B. C. Focal attention produces spatially selective processing in visual cortical areas V1, V2,  
713 and V4 in the presence of competing stimuli. *Journal of Neurophysiology* **70**, 909–919 (1993).
- 714 24. Tootell, R. B. H. *et al.* The Retinotopy of Visual Spatial Attention. *Neuron* **21**, 1409–1422 (1998).
- 715 25. Ogawa, T. & Komatsu, H. Neuronal dynamics of bottom-up and top-down processes in area V4 of  
716 macaque monkeys performing a visual search. *Exp Brain Res* **173**, 1–13 (2006).
- 717 26. Zhang, X., Zhaoping, L., Zhou, T. & Fang, F. Neural Activities in V1 Create a Bottom-Up Saliency  
718 Map. *Neuron* **73**, 183–192 (2012).
- 719 27. Li, Z. A saliency map in primary visual cortex. *Trends in Cognitive Sciences* **6**, 9–16 (2002).
- 720 28. Beck, V. M., Hollingworth, A. & Luck, S. J. Simultaneous Control of Attention by Multiple Working  
721 Memory Representations. *Psychol Sci* **23**, 887–898 (2012).
- 722 29. Olivers, C. N. L., Meijer, F. & Theeuwes, J. Feature-based memory-driven attentional capture: Visual  
723 working memory content affects visual attention. *Journal of Experimental Psychology: Human*  
724 *Perception and Performance* **32**, 1243–1265 (2006).
- 725 30. Carlisle, N. B., Arita, J. T., Pardo, D. & Woodman, G. F. Attentional Templates in Visual Working  
726 Memory. *Journal of Neuroscience* **31**, 9315–9322 (2011).
- 727 31. Pashler, H. & Shiu, L. Do images involuntarily trigger search? A test of Pillsbury's hypothesis.  
728 *Psychonomic Bulletin & Review* **6**, 445–448 (1999).
- 729 32. Downing, P. E. Interactions Between Visual Working Memory and Selective Attention. *Psychol Sci*  
730 **11**, 467–473 (2000).
- 731 33. Soto, D., Heinke, D., Humphreys, G. W. & Blanco, M. J. Early, Involuntary Top-Down Guidance of  
732 Attention From Working Memory. *Journal of Experimental Psychology: Human Perception and*  
733 *Performance* **31**, 248–261 (2005).
- 734 34. Arita, J. T., Carlisle, N. B. & Woodman, G. F. Templates for rejection: Configuring attention to ignore  
735 task-irrelevant features. *Journal of Experimental Psychology: Human Perception and Performance*  
736 **38**, 580–584 (2012).
- 737 35. Conci, M., Deichsel, C., Müller, H. J. & Töllner, T. Feature guidance by negative attentional templates  
738 depends on search difficulty. *Visual Cognition* **27**, 317–326 (2019).
- 739 36. Moher, J. & Egeth, H. E. The ignoring paradox: Cueing distractor features leads first to selection,  
740 then to inhibition of to-be-ignored items. *Attention, Perception, & Psychophysics* **74**, 1590–1605  
741 (2012).
- 742 37. Reeder, R. R., Olivers, C. N. L. & Pollmann, S. Cortical evidence for negative search templates.  
743 *Visual Cognition* **25**, 278–290 (2017).
- 744 38. Beck, V. M. & Hollingworth, A. Evidence for negative feature guidance in visual search is explained  
745 by spatial recoding. *Journal of Experimental Psychology: Human Perception and Performance* **41**,  
746 1190–1196 (2015).
- 747 39. Becker, M. W., Hemsteger, S. & Peltier, C. No templates for rejection: a failure to configure attention  
748 to ignore task-irrelevant features. *Visual Cognition* **23**, 1150–1167 (2015).
- 749 40. Failing, M., Feldmann-Wüstefeld, T., Wang, B., Olivers, C. & Theeuwes, J. Statistical regularities  
750 induce spatial as well as feature-specific suppression. *Journal of Experimental Psychology: Human*  
751 *Perception and Performance* **45**, 1291–1303 (2019).
- 752 41. Wang, B. & Theeuwes, J. Statistical regularities modulate attentional capture. *Journal of*  
753 *Experimental Psychology: Human Perception and Performance* **44**, 13–17 (2018).

- 754 42. Won, B.-Y. & Geng, J. J. Passive exposure attenuates distraction during visual search. *Journal of*  
755 *Experimental Psychology: General* (2020) doi:10.1037/xge0000760.
- 756 43. Turatto, M. & Pascucci, D. Short-term and long-term plasticity in the visual-attention system:  
757 Evidence from habituation of attentional capture. *Neurobiology of Learning and Memory* **130**, 159–  
758 169 (2016).
- 759 44. Turatto, M., Bonetti, F., Pascucci, D. & Chelazzi, L. Desensitizing the attention system to distraction  
760 while idling: A new latent learning phenomenon in the visual attention domain. *Journal of*  
761 *Experimental Psychology: General* **147**, 1827–1850 (2018).
- 762 45. Engel, S. A. & Furmanski, C. S. Selective Adaptation to Color Contrast in Human Primary Visual  
763 Cortex. *J. Neurosci.* **21**, 3949–3954 (2001).
- 764 46. Gardner, J. L. *et al.* Contrast Adaptation and Representation in Human Early Visual Cortex. *Neuron*  
765 **47**, 607–620 (2005).
- 766 47. Kristjansson, A., Vuilleumier, P., Schwartz, S., Macaluso, E. & Driver, J. Neural Basis for Priming of  
767 Pop-Out during Visual Search Revealed with fMRI. *Cerebral Cortex* **17**, 1612–1624 (2007).
- 768 48. Grill-Spector, K. & Malach, R. fMR-adaptation: a tool for studying the functional properties of human  
769 cortical neurons. *Acta Psychologica* **107**, 293–321 (2001).
- 770 49. Failing, M., Wang, B. & Theeuwes, J. Spatial suppression due to statistical regularities is driven by  
771 distractor suppression not by target activation. *Atten Percept Psychophys* **81**, 1405–1414 (2019).
- 772 50. Geyer, T., Müller, H. J. & Krummenacher, J. Cross-trial priming in visual search for singleton  
773 conjunction targets: Role of repeated target and distractor features. *Perception & Psychophysics* **68**,  
774 736–749 (2006).
- 775 51. Won, B.-Y., Forloines, M., Zhou, Z. & Geng, J. J. Changes in visual cortical processing attenuate  
776 singleton distraction during visual search. *Cortex* (in press).
- 777 52. van Moorselaar, D. & Slagter, H. A. Learning What Is Irrelevant or Relevant: Expectations Facilitate  
778 Distractor Inhibition and Target Facilitation through Distinct Neural Mechanisms. *J. Neurosci.* **39**,  
779 6953–6967 (2019).
- 780 53. Turk-Browne, N. B., Scholl, B. J., Chun, M. M. & Johnson, M. K. Neural Evidence of Statistical  
781 Learning: Efficient Detection of Visual Regularities Without Awareness. *Journal of Cognitive*  
782 *Neuroscience* **21**, 1934–1945 (2009).
- 783 54. Schapiro, A. C., Gregory, E., Landau, B., McCloskey, M. & Turk-Browne, N. B. The Necessity of the  
784 Medial Temporal Lobe for Statistical Learning. *Journal of Cognitive Neuroscience* **26**, 1736–1747  
785 (2014).
- 786 55. Theeuwes, J. Perceptual selectivity for color and form. *Perception & Psychophysics* **51**, 599–606  
787 (1992).
- 788 56. Gaspelin, N., Leonard, C. J. & Luck, S. J. Direct Evidence for Active Suppression of Salient-but-  
789 Irrelevant Sensory Inputs. *Psychol Sci* **26**, 1740–1750 (2015).
- 790 57. Gaspelin, N., Leonard, C. J. & Luck, S. J. Suppression of overt attentional capture by salient-but-  
791 irrelevant color singletons. *Attention, Perception, & Psychophysics* **79**, 45–62 (2017).
- 792 58. Vatterott, D. B. & Vecera, S. P. Experience-dependent attentional tuning of distractor rejection.  
793 *Psychon Bull Rev* **19**, 871–878 (2012).
- 794 59. Goschy, H., Bakos, S., Müller, H. J. & Zehetleitner, M. Probability cueing of distractor locations:  
795 both intertrial facilitation and statistical learning mediate interference reduction. *Front. Psychol.* **5**,  
796 (2014).
- 797 60. Turatto, M. & Galfano, G. Attentional capture by color without any relevant attentional set. *Perception*  
798 *& Psychophysics* **63**, 286–297 (2001).
- 799 61. Mounts, J. R. W. Evidence for suppressive mechanisms in attentional selection: Feature singletons  
800 produce inhibitory surrounds. *Perception & Psychophysics* **62**, 969–983 (2000).
- 801 62. Kamitani, Y. & Tong, F. Decoding the visual and subjective contents of the human brain. *Nat*  
802 *Neurosci* **8**, 679–685 (2005).
- 803 63. Serences, J. T. & Saproo, S. Computational advances towards linking BOLD and behavior.  
804 *Neuropsychologia* **50**, 435–446 (2012).
- 805 64. Norman, K. A., Polyn, S. M., Detre, G. J. & Haxby, J. V. Beyond mind-reading: multi-voxel pattern  
806 analysis of fMRI data. *Trends in Cognitive Sciences* **10**, 424–430 (2006).



- 807 65. Tong, F. & Pratte, M. S. Decoding Patterns of Human Brain Activity. *Annu. Rev. Psychol.* **63**, 483–  
808 509 (2012).
- 809 66. Cox, D. D. & Savoy, R. L. Functional magnetic resonance imaging (fMRI) “brain reading”: detecting  
810 and classifying distributed patterns of fMRI activity in human visual cortex. *NeuroImage* **19**, 261–270  
811 (2003).
- 812 67. Haynes, J.-D. & Rees, G. Predicting the orientation of invisible stimuli from activity in human primary  
813 visual cortex. *Nat Neurosci* **8**, 686–691 (2005).
- 814 68. Emrich, S. M., Riggall, A. C., LaRocque, J. J. & Postle, B. R. Distributed Patterns of Activity in  
815 Sensory Cortex Reflect the Precision of Multiple Items Maintained in Visual Short-Term Memory.  
816 *Journal of Neuroscience* **33**, 6516–6523 (2013).
- 817 69. Lewis-Peacock, J. A. & Postle, B. R. Decoding the internal focus of attention. *Neuropsychologia* **50**,  
818 470–478 (2012).
- 819 70. Sprague, T. C., Boynton, G. M. & Serences, J. T. The Importance of Considering Model Choices  
820 When Interpreting Results in Computational Neuroimaging. *eNeuro* **6**, ENEURO.0196-19.2019  
821 (2019).
- 822 71. Sprague, T. C. *et al.* Inverted Encoding Models Assay Population-Level Stimulus Representations,  
823 Not Single-Unit Neural Tuning. *eNeuro* **5**, ENEURO.0098-18.2018 (2018).
- 824 72. van Bergen, R. S., Ji Ma, W., Pratte, M. S. & Jehee, J. F. M. Sensory uncertainty decoded from  
825 visual cortex predicts behavior. *Nat Neurosci* **18**, 1728–1730 (2015).
- 826 73. van Bergen, R. S. & Jehee, J. F. M. Probabilistic Representation in Human Visual Cortex Reflects  
827 Uncertainty in Serial Decisions. *J. Neurosci.* **39**, 8164–8176 (2019).
- 828 74. Lawson, C. L. & Hanson, R. J. Chapter 23. in *Solving Least-Squares Problems* (Prentice-Hall, 1974).
- 829 75. Carandini, M. & Heeger, D. J. Normalization as a canonical neural computation. *Nat Rev Neurosci*  
830 **13**, 51–62 (2012).
- 831 76. Solomon, S. G. & Kohn, A. Moving Sensory Adaptation beyond Suppressive Effects in Single  
832 Neurons. *Current Biology* **24**, R1012–R1022 (2014).
- 833 77. Karni, A. & Sagi, D. Where practice makes perfect in texture discrimination: evidence for primary  
834 visual cortex plasticity. *Proceedings of the National Academy of Sciences* **88**, 4966–4970 (1991).
- 835 78. Schwartz, S., Maquet, P. & Frith, C. Neural correlates of perceptual learning: A functional MRI study  
836 of visual texture discrimination. *Proceedings of the National Academy of Sciences* **99**, 17137–17142  
837 (2002).
- 838 79. Jehee, J. F. M., Ling, S., Swisher, J. D., van Bergen, R. S. & Tong, F. Perceptual Learning  
839 Selectively Refines Orientation Representations in Early Visual Cortex. *Journal of Neuroscience* **32**,  
840 16747–16753 (2012).
- 841 80. Feldmann-Wüstefeld, T. & Schubö, A. Intertrial priming due to distractor repetition is eliminated in  
842 homogeneous contexts. *Atten Percept Psychophys* **78**, 1935–1947 (2016).
- 843 81. Reavis, E. A., Frank, S. M., Greenlee, M. W. & Tse, P. U. Neural correlates of context-dependent  
844 feature conjunction learning in visual search tasks. *Hum Brain Mapp* **37**, 2319–2330 (2016).
- 845 82. Sawaki, R. & Luck, S. J. Capture versus suppression of attention by salient singletons:  
846 Electrophysiological evidence for an automatic attend-to-me signal. *Attention, Perception, &*  
847 *Psychophysics* **72**, 1455–1470 (2010).
- 848 83. Gaspar, J. M. & McDonald, J. J. Suppression of Salient Objects Prevents Distraction in Visual  
849 Search. *Journal of Neuroscience* **34**, 5658–5666 (2014).
- 850 84. Hickey, C., Di Lollo, V. & McDonald, J. J. Electrophysiological Indices of Target and Distractor  
851 Processing in Visual Search. *Journal of Cognitive Neuroscience* **21**, 760–775 (2009).
- 852 85. Moher, J., Lakshmanan, B. M., Egeth, H. E. & Ewen, J. B. Inhibition Drives Early Feature-Based  
853 Attention. *Psychological Science* **25**, 315–324 (2014).
- 854 86. Zhang, W. & Luck, S. J. Feature-based attention modulates feedforward visual processing. *Nat*  
855 *Neurosci* **12**, 24–25 (2009).
- 856 87. Serences, J. T., Yantis, S., Culberson, A. & Awh, E. Preparatory Activity in Visual Cortex Indexes  
857 Distractor Suppression During Covert Spatial Orienting. *Journal of Neurophysiology* **92**, 3538–3545  
858 (2004).

- 859 88. Heuer, A. & Schubö, A. Cueing distraction: electrophysiological evidence for anticipatory active  
860 suppression of distractor location. *Psychological Research* (2019) doi:10.1007/s00426-019-01211-4.  
861 89. Hickey, C. & Peelen, M. V. Neural Mechanisms of Incentive Saliency in Naturalistic Human Vision.  
862 *Neuron* **85**, 512–518 (2015).  
863 90. Itthipuripat, S., Vo, V. A., Sprague, T. C. & Serences, J. T. Value-driven attentional capture enhances  
864 distractor representations in early visual cortex. *PLoS Biol* **17**, e3000186 (2019).  
865 91. Kim, H. & Anderson, B. A. Dissociable neural mechanisms underlie value-driven and selection-driven  
866 attentional capture. *Brain Research* **1708**, 109–115 (2019).  
867 92. Serences, J. T. Value-Based Modulations in Human Visual Cortex. *Neuron* **60**, 1169–1181 (2008).  
868 93. MacLean, M. H. & Giesbrecht, B. Neural evidence reveals the rapid effects of reward history on  
869 selective attention. *Brain Research* **1606**, 86–94 (2015).  
870 94. Stanisor, L., van der Togt, C., Pennartz, C. M. A. & Roelfsema, P. R. A unified selection signal for  
871 attention and reward in primary visual cortex. *Proceedings of the National Academy of Sciences* **110**,  
872 9136–9141 (2013).  
873 95. Chelazzi, L. *et al.* Altering Spatial Priority Maps via Reward-Based Learning. *Journal of Neuroscience*  
874 **34**, 8594–8604 (2014).  
875 96. Anderson, B. A. & Kim, H. On the relationship between value-driven and stimulus-driven attentional  
876 capture. *Atten Percept Psychophys* **81**, 607–613 (2019).  
877 97. Maunsell, J. H. R. Neuronal representations of cognitive state: reward or attention? *Trends in*  
878 *Cognitive Sciences* **8**, 261–265 (2004).  
879 98. Hickey, C. & Peelen, M. V. Reward Selectively Modulates the Lingering Neural Representation of  
880 Recently Attended Objects in Natural Scenes. *J. Neurosci.* **37**, 7297–7304 (2017).  
881 99. Kastner, S., Pinsk, M. A., De Weerd, P., Desimone, R. & Ungerleider, L. G. Increased Activity in  
882 Human Visual Cortex during Directed Attention in the Absence of Visual Stimulation. *Neuron* **22**,  
883 751–761 (1999).  
884 100. Kastner, S. Mechanisms of Directed Attention in the Human Extrastriate Cortex as Revealed by  
885 Functional MRI. *Science* **282**, 108–111 (1998).  
886 101. Foster, J. J., Bsaies, E. M., Jaffe, R. J. & Awh, E. Alpha-Band Activity Reveals Spontaneous  
887 Representations of Spatial Position in Visual Working Memory. *Current Biology* **27**, 3216-3223.e6  
888 (2017).  
889 102. Maljkovic, V. & Nakayama, K. Priming of pop-out: I. Role of features. *Memory & Cognition* **22**,  
890 657–672 (1994).  
891 103. Foster, J. J., Sutterer, D. W., Serences, J. T., Vogel, E. K. & Awh, E. Alpha-Band Oscillations  
892 Enable Spatially and Temporally Resolved Tracking of Covert Spatial Attention. *Psychological*  
893 *Science* **28**, 929–941 (2017).  
894 104. Engel, S. A. *et al.* fMRI of human visual cortex. *Nature* **369**, 525–525 (1994).  
895 105. Swisher, J. D., Halko, M. A., Merabet, L. B., McMains, S. A. & Somers, D. C. Visual Topography  
896 of Human Intraparietal Sulcus. *Journal of Neuroscience* **27**, 5326–5337 (2007).  
897 106. Brainard, D. H. The Psychophysics Toolbox. *Spat Vis* **10**, 433–436 (1997).  
898 107. Pelli, D. G. The VideoToolbox software for visual psychophysics: transforming numbers into  
899 movies. *Spatial Vision* **10**, 437–442 (1997).  
900 108. Andersson, J. L. R., Skare, S. & Ashburner, J. How to correct susceptibility distortions in spin-  
901 echo echo-planar images: application to diffusion tensor imaging. *NeuroImage* **20**, 870–888 (2003).  
902 109. Jenkinson, M., Beckmann, C. F., Behrens, T. E. J., Woolrich, M. W. & Smith, S. M. FSL.  
903 *NeuroImage* **62**, 782–790 (2012).  
904 110. Smith, S. M. *et al.* Advances in functional and structural MR image analysis and implementation  
905 as FSL. *NeuroImage* **23**, S208–S219 (2004).  
906 111. Rademaker, R. L., Chunharas, C. & Serences, J. T. Coexisting representations of sensory and  
907 mnemonic information in human visual cortex. *Nat Neurosci* **22**, 1336–1344 (2019).  
908 112. Dale, A. M., Fischl, B. & Sereno, M. I. Cortical Surface-Based Analysis. *NeuroImage* **9**, 179–194  
909 (1999).  
910 113. Greve, D. N. & Fischl, B. Accurate and robust brain image alignment using boundary-based  
911 registration. *NeuroImage* **48**, 63–72 (2009).

- 912 114. Jenkinson, M. & Smith, S. A global optimisation method for robust affine registration of brain  
913 images. *Medical Image Analysis* **5**, 143–156 (2001).
- 914 115. Jenkinson, M., Bannister, P., Brady, M. & Smith, S. Improved Optimization for the Robust and  
915 Accurate Linear Registration and Motion Correction of Brain Images. *NeuroImage* **17**, 825–841  
916 (2002).
- 917 116. Brouwer, G. J. & Heeger, D. J. Decoding and Reconstructing Color from Responses in Human  
918 Visual Cortex. *Journal of Neuroscience* **29**, 13992–14003 (2009).
- 919  
920
