1 **Abbreviated title:** HISTORY MODULATES DISTRACTORS

2

3

4

5

**History modulates early sensory processing of salient distractors**

6

7

Kirsten C.S. Adam<sup>1</sup> & John T. Serences<sup>1,2,3</sup>

8

9

<sup>1</sup> Department of Psychology, *University of California San Diego*

10

<sup>2</sup> Institute for Neural Computation, *University of California San Diego*

11

<sup>3</sup> Neurosciences Graduate Program, *University of California San Diego*

12

13

**Word count (abstract):** 237

14

**Word count (not including abstract, methods, references, figure legends):** 5,471

15

**Word count (methods):** 2,463

16

**Tables:** 0

17

**Figures:** 6

18

19

**Keywords:** visual search; fMRI; priority maps; attentional selection; salience

20

21

**Contributions:** K.A. collected data, performed analyses, and drafted the manuscript.

22

Both authors designed the study and revised the manuscript.

23

24

**Funding:** Research was supported by National Eye Institute grant R01 EY025872

25

(J.S.), National Institute of Mental Health grant T32-MH020002 (K.A.), and National Eye

26

Institute grant T32-EY020503 (K.A.).

27

28

**Data availability:** Data will be made freely available online on the Open Science

29

Framework at <https://osf.io/wrdvz/> upon acceptance for publication.

30

31

**Acknowledgements:** We thank Rosanne Rademaker for scanning assistance and for

32

sharing custom analysis code. We thank Nicole Rangan and Matteo d'Amico for

33

assistance with behavioral data collection, and we thank Ed Awh for helpful comments

34

on earlier drafts of the manuscript.

35

36

**Conflicts of interest:** none

37

38

**Correspondence to:**

39

Kirsten C. S. Adam

40

University of California San Diego

41

9500 Gilman Drive, Mail Code: 0109

42

La Jolla, CA 92093-0109

43

[kadam@ucsd.edu](mailto:kadam@ucsd.edu)

44

45  
46  
47  
48  
49  
50  
51  
52  
53  
54  
55  
56  
57  
58  
59  
60  
61  
62  
63  
64  
65  
66  
67  
68  
69  
70  
71  
72  
73  
74

**Abstract**

To find important objects, we must focus on our goals, ignore distractions, and take our changing environment into account. This is formalized in models of visual search whereby goal-driven, stimulus-driven and history-driven factors are integrated into a priority map that guides attention. Stimulus history robustly influences where attention is allocated even when the physical stimulus is the same: when a salient distractor is repeated over time, it captures attention less effectively. A key open question is how we come to ignore salient distractors when they are repeated. Goal-driven accounts propose that we use an active, expectation-driven mechanism to attenuate the distractor signal (e.g., predictive coding), whereas stimulus-driven accounts propose that the distractor signal is attenuated due to passive changes to neural activity and inter-item competition (e.g., adaptation). To test these competing accounts, we measured item-specific fMRI responses in human visual cortex during a visual search task where trial history was manipulated (colors unpredictably switched or were repeated). Consistent with a stimulus-driven account of history-based distractor suppression, we found that repeated singleton distractors were suppressed starting in V1, and distractor suppression did not increase in later visual areas. In contrast, we observed signatures of goal-driven target enhancement that were absent in V1, increased across visual areas, and were not modulated by stimulus history. Our data suggest that stimulus history does not alter goal-driven expectations, but rather modulates canonically stimulus-driven sensory responses to contribute to a temporally-integrated representation of priority.

75  
76  
77  
78  
79  
80  
81  
82  
83  
84  
85  
86  
87  
88  
89  
90  
91  
92  
93  
94  
95  
96  
97  
98  
99  
100  
101  
102  
103  
104

### Significance Statement

Visual search refers to our ability to find what we are looking for in a cluttered visual world (e.g., finding your keys). To perform visual search, we must integrate information about our goals (e.g., ‘find the red key-chain’), the environment (e.g., salient items capture your attention), and changes to the environment (i.e., stimulus history). Although stimulus history impacts behavior, the neural mechanisms that mediate history-driven effects remain debated. Here, we leveraged fMRI and multivariate analysis techniques to measure history-driven changes to the neural representation of items during visual search. We found that stimulus history influenced the representation of a salient ‘pop-out’ distractor starting in V1, suggesting that stimulus history operates via modulations in early sensory processing rather than goal-driven expectations.

105

## Introduction

106

107

108

109

110

111

112

113

114

115

116

117

118

119

120

121

122

123

124

125

126

127

128

129

130

131

132

133

134

At any moment we can selectively attend only a small fraction of available perceptual inputs, so we need to select a subset of information and discard irrelevant information. This capacity limit poses a significant computational challenge, particularly given that perceptual inputs constantly change as we move through the world. Given our constantly changing surroundings, one particularly useful computational strategy is to discard information that stays the same over time. For example, when searching for sea glass at the beach, irrelevant but salient information (e.g., a red plastic bottle-cap) may grab our attention. But, if we repeatedly encounter the same irrelevant information (e.g., the beach is littered with red bottle-caps), then we can come to ignore initially salient distractors. Extensive evidence suggests that stimulus history robustly modulates behavior: An initially salient color distractor no longer captures our attention after we have seen it many times (Geyer et al., 2006; Vatterott and Vecera, 2012; Geng, 2014; Gaspelin et al., 2015, 2017; Wang and Theeuwes, 2018a; Failing et al., 2019a; Geng et al., 2019; Van Moorselaar and Slagter, 2020). Yet, debate persists as to how this history-driven behavioral modulation is achieved: Do we use an active, expectation-based mechanism to suppress the salient distractor signal when it is repeated (e.g., predictive coding), or, is the distractor signal passively attenuated because of changes to neural activity with repetition (e.g., adaptation)? Here, we leverage item-specific, neural estimates of priority, to test competing hypotheses of how stimulus history alters attentional priority.

Models of visual search hypothesize that we integrate information about what is relevant (*goal-driven* or *'top-down' factors*), what is salient given local image statistics (*stimulus-driven* or *'bottom-up' factors*), and what has occurred in the past (*history-driven factors*) via an integrated, topographically organized "priority map" (Treisman and Gelade, 1980; Wolfe, 1994; Itti and Koch, 2000; Fecteau and Munoz, 2006; Serences and Yantis, 2006; Awh et al., 2012). Note, some work uses the terms 'saliency' and 'priority' interchangeably, whereas other work uses these terms to refer to distinct concepts. Here, we use 'priority' to refer to the integration of goal-driven and stimulus-driven task factors, and 'saliency' to refer to strictly image-computable, stimulus-driven task factors (Serences and Yantis, 2006). Although both stimulus-driven and goal-driven information is

135 represented to some extent in many cortical regions (Silver et al., 2005; Serences and  
136 Yantis, 2006, 2007; Saproo and Serences, 2010; Bogler et al., 2011; Sprague and  
137 Serences, 2013; Sprague et al., 2018b), areas of parietal cortex (e.g., LIP, IPS) are  
138 hypothesized to be ideal candidates for integrating information about stimulus-driven  
139 sensory inputs from occipital cortex and information about goals from pre-frontal cortex  
140 (Ipata et al., 2006, 2009; Bisley and Mirpour, 2019; Theeuwes, 2019).

141 History-driven effects have only recently been added to models of visual search,  
142 in part because these effects do not wholly fit within a ‘goal-driven’ versus ‘stimulus-  
143 driven’ dichotomous framework (Awh et al., 2012; Geng, 2014; Le Pelley et al., 2016;  
144 Geng et al., 2019; Van Moorselaar and Slagter, 2020). Rather, history-driven effects rely  
145 on both current sensory input and prior experiences. Thus, debate persists about whether  
146 stimulus history influences attentional priority by co-opting elements of stimulus-driven  
147 computations, goal-driven computations, or another pathway altogether (Gaspelin et al.,  
148 2015; Gaspelin and Luck, 2018; Wang and Theeuwes, 2018b; Geng et al., 2019;  
149 Theeuwes, 2019; Van Moorselaar and Slagter, 2020).

150 Goal-driven accounts propose that we exploit voluntary selection mechanisms to  
151 incorporate information about history-driven task factors into priority maps. Earlier work  
152 has shown how voluntary attention may be used to enhance the target item relative to the  
153 other distractor items: when looking for a particular target, one may form a “template” of  
154 that feature and use this template to voluntarily up-regulate relevant portions of the visual  
155 field (Pashler and Shiu, 1999; Downing, 2000; Soto et al., 2005; Olivers et al., 2006;  
156 Carlisle et al., 2011; Beck et al., 2012). Similar voluntary selection mechanisms might  
157 likewise be used to suppress a distractor signal when it is repeated, either directly or  
158 indirectly. First, distractor suppression could arise *indirectly* because of predictive coding  
159 and biased competition (Desimone and Duncan, 1995; Spratling, 2008; Summerfield and  
160 de Lange, 2014). In this account of history-driven distractor suppression, participants  
161 could use their expectations about the upcoming, repeated stimulus futures to more  
162 strongly enhance the target and, consequently, the competing distractor would be  
163 automatically suppressed due to inter-item competition (Spratling, 2008). Second,  
164 distractor suppression could arise *directly*, via a top-down suppression signal for a

165 specific feature. This direct suppression signal is sometimes referred to as a “negative  
166 search template” (Arita et al., 2012; Moher and Egeth, 2012; Reeder et al., 2017; Conci  
167 et al., 2019, but see: Beck and Hollingworth, 2015; Becker et al., 2015). Critically, in either  
168 the direct or indirect case, we would expect to observe a similar neural signature at the  
169 level of population codes measured with fMRI for both of these goal-driven accounts.  
170 Specifically, we should observe that distractor suppression effects are greater in later  
171 visual areas (e.g., IPS0) than in earlier visual areas (e.g., V1), consistent with a goal-  
172 driven signal (e.g., Silver et al., 2005; Sprague et al., 2018b). In the case of the predictive  
173 coding / biased competition model (Spratling, 2008), we would further predict that target  
174 enhancement and distractor suppression should be yoked, whereby greater distractor  
175 suppression will be accompanied by greater target enhancement as arrays are repeated.

176 In contrast, stimulus-driven accounts instead suggest that history-driven distractor  
177 suppression can arise from passive changes to neural activity as stimuli are presented  
178 over time (Turatto and Pascucci, 2016; Turatto et al., 2018; Wang and Theeuwes, 2018a;  
179 Failing et al., 2019a; Won and Geng, 2020). For example, some work suggests that even  
180 passive, task-irrelevant exposure to a particular feature may be sufficient to alter  
181 attentional guidance and search behaviors (Engel and Furmanski, 2001; Grill-Spector and  
182 Malach, 2001; Gardner et al., 2005; Kristjansson et al., 2007; Turatto and Pascucci, 2016;  
183 Turatto et al., 2018; Won and Geng, 2020). Although the effects of adaptation for single  
184 stimuli are well understood, how adaptation affects saliency in multi-item displays has  
185 only recently been considered. Yet, emerging evidence suggests that altered firing rates  
186 from simple sensory adaptation effects could alter inter-item competition (Solomon and  
187 Kohn, 2014) which, in turn, could alter stimulus saliency and behavior (Treisman and  
188 Gelade, 1980; Wolfe, 1994; Itti and Koch, 2000; Li, 2002; Zhang et al., 2012).

189 Here, we tackle the debate about history-driven distractor suppression from a new  
190 angle: we measured neural activity via fMRI in human subjects performing a visual search  
191 task in order to estimate item-specific changes to neural priority across the visual stream.  
192 Critically, we manipulated trial history so that we could compare neural responses to  
193 physically identical displays (e.g., green target, red singleton distractor) as a function of  
194 trial history (i.e., whether the colors of preceding displays repeated or varied).

195 **Materials and Methods**

196 **Participants**

197 **Experiment 1a: MRI experiment.** Healthy volunteers ( $n = 12$ ; 9 female; mean age  
198 = 25.3 years [SD = 2.5, min = 21, max = 30]; all right-handed; normal or corrected-to-  
199 normal visual acuity; normal color vision) participated in three ~2 hour sessions at the  
200 Keck Center for fMRI on the University of California San Diego (UCSD) campus, and were  
201 compensated \$20/hr. Procedures were approved by the UCSD Institutional Review  
202 Board, and participants provided written informed consent. Sample size was determined  
203 by a power analysis on data from Sprague et al. (Sprague et al., 2018b) where achieved  
204 power (1- $\beta$ ) to detect a within-subjects attention modulation using an inverted encoding  
205 model was 83% (across 10 ROIs) with  $n=8$ . We planned for  $n = 11$  to achieve estimated  
206 90% power (rounded up to  $n = 12$  to satisfy our counter-balancing criteria).

207 **Experiment 1b: Behavior only.** Healthy volunteers ( $n = 24$ ; 21 female; mean age  
208 = 19.8 years [SD = 1.5, min = 18, max = 24]; normal or corrected-to-normal visual acuity;  
209 normal color vision; handedness not recorded) participated in one 1.5-hour experimental  
210 session in the Department of Psychology on the UCSD campus, and were compensated  
211 with course credit. There were no duplicate participants across experiments. Procedures  
212 were approved by the UCSD IRB, and all participants provided written informed consent.  
213 A sample size of 24 was chosen *a priori* based on published papers (Gaspelin et al., 2015).

214

215 **Session procedures**

216 **Exp 1a, Retinotopy session.** Participants completed one retinotopic mapping  
217 session prior to participation in the experimental sessions, following standard  
218 procedures (Engel et al., 1994; Swisher et al., 2007). Some participants had already  
219 completed a retinotopy session as part of prior studies in the lab; this session was used  
220 if available. Retinotopy data were used to identify retinotopic ROIs (V1-V3, V3AB, hV4,  
221 VO1, VO2, LO1, LO2, TO1, TO2, IPS0-4). During each session, participants viewed  
222 flickering checkerboards. On meridian mapping runs, a “bowtie” checkerboard alternated  
223 between the horizontal and vertical meridians. On polar angle mapping runs, a  
224 checkerboard wedge slowly rotated in a clockwise or counterclockwise direction. On



225 eccentricity mapping runs, a “donut” checkerboard began near fixation and its radius  
226 slowly expanded outward. A high-resolution anatomical scan was collected for functional  
227 alignment. Anatomical and functional retinotopy analyses were performed using custom  
228 code calling existing FreeSurfer and FSL functions. Functional retinotopy data were used  
229 to draw ROIs, but only voxels that were also visually responsive to experimental localizers  
230 (below) were analyzed further.

231 **Exp 1a, Main MRI session.** Participants completed two experimental sessions. In  
232 each session, they completed 2 runs of the item position localizer, 4 runs of the spatial  
233 location localizer, and 8 runs of the search task (4 runs “color variable”, 4 runs “color  
234 constant”). When time allowed, extra localizer runs were collected. Some participants also  
235 took part in an unrelated study in which additional localizers were collected. Across the  
236 two sessions, participants completed 16 runs of visual search ( $M = 1,1152$  trials,  $SD = 0$ ),  
237 an average of 11.2 runs of the spatial location localizer ( $M = 1,072$  trials,  $SD = 298$ , min  
238 = 768, max = 1,536), and an average of 4.3 item position localizer runs ( $M = 381$  trials,  
239  $SD = 43$ , min = 352, max = 440).

240 **Exp 1b.** Participants completed 12 blocks of the search task (6 blocks “color  
241 variable”, 6 blocks “color constant”).

242

## 243 **Stimuli and task procedures**

### 244 **Experiment 1a: MRI**

245 Stimuli were projected on a 21.5 x 16 cm screen mounted inside the scanner bore.  
246 The screen was viewed from a distance of ~47 cm through a mirror. Stimuli were  
247 generated in MATLAB (2017b, The MathWorks, Natick, MA) with the Psychophysics  
248 toolbox (Brainard, 1997; Pelli, 1997) on a laptop running Ubuntu. Responses were  
249 collected with a 4-button button box. Stimuli for each task are shown in Figure 1.

250 **Item position localizer.** Participants viewed reversing checkerboards (4 Hz  
251 flicker) which occupied the locations of the items in the search task (each item radius =  
252  $2.5^\circ$  placed on an imaginary circle  $7^\circ$  from fixation, with one item in each of the 4  
253 quadrants on the circle). Participants were shown items on 2 alternating diagonals (i.e.,  
254 items in Quadrants 1 and 3 and then Quadrants 2 and 4) for 3 sec each. There were 88



255 stimulus presentations within each run. Participants were instructed to attend to both  
256 items, and to press a button if either item briefly dimmed. A brief (250 ms) dimming  
257 occurred on 1 of the 2 items for 25% of stimulus presentations.

258 **Spatial location localizer.** Participants viewed a reversing checkerboard wedge  
259 (flicker = 4 Hz; white & black checkerboards) at one of 24 positions. Checkerboard  
260 positions were equally spaced along a circle with radius =  $7^\circ$ , and wedges were non-  
261 overlapping (i.e., each wedge's width along the circle filled a  $15^\circ$  arc and was  $\sim 5^\circ$  of visual  
262 angle in height). The wedge stayed at one position for 3 sec, then moved to a different  
263 position (with the constraint that back-to-back positions must be in different quadrants).  
264 There were 96 wedge presentations within each run. Participants were instructed to  
265 attend to the fixation point; if the fixation point's color changed (increase or decrease in  
266 brightness), they pressed a button on the button box. A total of 20 fixation point color  
267 changes occurred throughout each run; changes to the fixation cross happened at  
268 random times with respect to wedge stimulus onsets. We chose to have participants  
269 attend fixation, rather than the stimulus position, during the localizer task to reduce  
270 contamination of eye movements on any observed decoding effects (Mostert et al., 2018).  
271 Generally, systematic eye movement biases are absent or greatly attenuated when  
272 participants attend fixation and ignore the peripheral stimulus. With this cross-task training  
273 and testing scheme, we would expect that decoding should be impaired for all 4 items if  
274 participants moved their eyes in the visual search task. Thus, this training-testing scheme  
275 protects against the possibility that item-specific target enhancement or distractor  
276 suppression effects could be driven by eye movements to a particular item in the display.

277 **Search task.** Participants performed a variant of the additional singleton search  
278 task (Theeuwes, 1992). On each trial, participants saw a search array containing 4 items  
279 (item colors were red, RGB = 255,0,0, or green, RGB = 0,255,0, and presented on a black  
280 background, RGB = 0,0,0). The items ( $2.4^\circ$  radius) were placed on an imaginary circle  $7^\circ$   
281 from fixation with 1 item in each visual quadrant (i.e.,  $45^\circ$ ,  $135^\circ$ ,  $225^\circ$  &  $315^\circ$ ). Participants  
282 fixated a small, gray dot ( $.2^\circ$ ) throughout each run. Participants searched for a "target"  
283 (the diamond-shaped item) among distractor items and reported the orientation of the  
284 small line inside (line size =  $.08^\circ \times .94^\circ$ ; orientation = horizontal or vertical) by pressing

285 one of two buttons. Non-singleton distractors, ‘non-targets’, had the same color as the  
286 shape-defined target (e.g., green circles). A “singleton distractor” was present on 66.67%  
287 of trials, and was a color singleton (e.g., red circle). Stimuli are illustrated in Figure 1.  
288 Note, throughout the manuscript, we will use the word “distractor” to refer to the color-  
289 singleton distractors, whereas non-singleton distractors will be referred to simply as “non-  
290 targets”. Target location (quadrant 1-4), distractor location relative to the target ( $-90^\circ$ ,  
291  $+90^\circ$ , or  $+180^\circ$ ), distractor presence (66.67% present), and the orientation of the line  
292 inside the target (horizontal or vertical) were fully counterbalanced within each run, for a  
293 total of 72 trials per run. Search set size was held constant at 4 items. The search array  
294 was presented for 2 sec followed by a blank inter-trial interval (equal probability of 2, 3.2,  
295 5, or 8 sec).

296 We manipulated the degree to which participants were behaviorally captured by  
297 the distractor by changing trial history. In “color variable” runs, the colors of targets and  
298 distractors swapped unpredictably. In “color constant” runs, the colors of targets and  
299 distractors were fixed throughout the run (e.g., the targets and non-singleton distractors  
300 were always green and the singleton distractor was always red). Based on prior work  
301 (Vatterott and Vecera, 2012; Gaspelin et al., 2017), we expected to observe robust  
302 behavioral capture by the singleton distractor in the color variable runs and no behavioral  
303 capture in the color constant runs.

304 Run types were blocked and partially counterbalanced within and across sessions,  
305 such that the order of the 2 conditions would be balanced across the 2 sessions for each  
306 participant. For example, if in Session 1 a participant first received 4 color variable runs  
307 followed by 4 color constant runs (red), then in Session 2 they would first receive 4 color  
308 constant runs (green) followed by 4 color variable runs.

309

### 310 **Experiment 1b: Behavior**

311 Participants performed the same additional singleton search task described above.  
312 Participants viewed the stimuli on CRT monitors (39 x 29.5 cm) from a distance of ~52  
313 cm. Stimulus parameters (size, color) and trial timing were matched to the fMRI  
314 experiment. Each experimental block contained a total of 48 search trials. Participants

315 performed a total of 12 blocks of trials (6 color variable, 3 color constant with red targets,  
316 3 color constant with green targets). The color constant and color variable conditions were  
317 blocked and counterbalanced across participants (half of participants received the color  
318 variable condition first).

319

### 320 **Magnetic resonance imaging acquisition parameters**

321 Scans were performed on a General Electric Discovery MR750 3.0T scanner at  
322 the Keck Center for Functional Magnetic Resonance Imaging on the UCSD campus.  
323 High-resolution (1mm<sup>3</sup> isotropic) anatomical images were collected as part of the  
324 retinotopy session. Most participants' (10 of 12) anatomical images were collected with  
325 an Invivo 8-channel head coil; 2 participants' anatomical images were collected with a  
326 Nova Medical 32-channel head coil (NMSC075-32-3GE-MR750). GE's "Phased array  
327 Uniformity Enhancement" (PURE) method was applied to anatomical data acquired using  
328 the 32-channel coil in an attempt to correct inhomogeneities in the signal intensity.  
329 Functional echo-planar imaging (EPI) data were collected with the Nova 32 channel coil  
330 using the GE multiband EPI sequence, using nine axial slices per band and a multiband  
331 factor of eight (total slices = 72; 2 mm<sup>3</sup> isotropic; 0 mm gap; matrix = 104 × 104; field of  
332 view = 20.8 cm; repetition time/echo time (TR/ TE) = 800/35 ms, flip angle = 52°; in-plane  
333 acceleration = 1). The initial 16 TRs in each run served as reference images for the  
334 transformation from *k*-space to image space. Un-aliasing and image reconstruction  
335 procedures were performed on local servers and on Amazon Web Service servers using  
336 code adapted from the Stanford Center for Cognitive and Neurobiological Imaging (CNI).  
337 Forward and reverse phase-encoding directions were used during the acquisition of two  
338 short (17 sec) "top-up" datasets. From these images, susceptibility-induced off-resonance  
339 fields were estimated (Andersson et al., 2003) and used to correct signal distortion  
340 inherent in EPI sequences, using FSL top-up (Smith et al., 2004; Jenkinson et al., 2012).

341

### 342 **Pre-processing**

343 Pre-processing of imaging data closely followed published lab procedures  
344 (Rademaker et al., 2019) using FreeSurfer and FSL. We performed cortical surface gray-

345 white matter volumetric segmentation of the high-resolution anatomical volume from the  
346 retinotopy session using FreeSurfer's "recon-all" procedures (Dale et al., 1999). The first  
347 volume of the first functional run from each scanning session was coregistered to this  
348 common T1-weighted anatomical image. To align data from all sessions to the same  
349 functional space, we created transformation matrices with FreeSurfer's registration tools  
350 (Greve and Fischl, 2009), and used these matrices to transform each four-dimensional  
351 functional volume using FSL's FLIRT (Jenkinson and Smith, 2001; Jenkinson et al.,  
352 2002). After cross-session alignment, motion correction was performed using FSL's  
353 McFLIRT (no spatial smoothing, 12 degrees of freedom). Voxelwise signal time-series  
354 were normalized via Z-scoring on a run-by-run basis. Analyses after preprocessing were  
355 performed using custom scripts in MATLAB 2018A.

356

### 357 **fMRI analyses: Inverted encoding model**

358 **Voxel selection for Decoding ROIs.** We defined visual ROI's using data from  
359 the retinotopy session following published lab procedures (Sprague and Serences, 2013;  
360 Rademaker et al., 2019). From these retinotopically-derived ROI's, we chose the subset  
361 of voxels that were spatially selective for the stimuli used in this task. We thresholded  
362 voxels using the independent mapping task data. We ran a one-way ANOVA with factor  
363 Quadrant on each voxel; significant voxels ( $p < .05$  uncorrected) were retained for  
364 analysis. For the aggregate analyses, we *a priori* created an early visual cortex ROI (all  
365 spatially selective voxels from V1-V3) and a parietal cortex ROI (all spatially selective  
366 voxels from IPS0-3). For individual ROI analyses, we used all individual retinotopic ROIs  
367 for which there were a minimum of 90 spatially selective voxels per participant: V1, V2,  
368 V3, V3AB, hV4, and IPS0.

369 **Inverted Encoding Model.** Following prior work (Brouwer and Heeger, 2009;  
370 Sprague and Serences, 2013), we used an inverted encoding model to estimate spatially-  
371 selective tuning functions from multivariate, voxel-wise activity within each ROI. We  
372 assumed that each voxel's activity reflects the weighted sum of 24 spatially selective  
373 channels, each tuned for a different angular location. These information channels are  
374 assumed to reflect the activity of underlying neuronal populations tuned to each location.

375 We modeled the response profile of each spatial channel as a half sinusoid raised to the  
376 24<sup>th</sup> power:

377 
$$R = \sin(0.5\theta)^{24},$$

378 where  $\theta$  is angular location (0–359°, centered on each of the 24 bins from the mapping  
379 task), and  $R$  is the response of the spatial channel in arbitrary units.

380 Independent training data  $B_1$  were used to estimate weights that approximate the  
381 relative contribution of the 24 spatial channels to the observed response at each voxel.  
382 Let  $B_1$  ( $m$  voxels  $\times$   $n_1$  observations) be the activity at each voxel for each measurement  
383 in the training set,  $C_1$  ( $k$  channels  $\times$   $n_1$  observations) be the predicted response of each  
384 spatial channel (determined by the basis functions) for each measurement, and  $W$  ( $m$   
385 voxels  $\times$   $k$  channels) be a weight matrix that characterizes a linear mapping from “channel  
386 space” to “voxel space”. The relationship between  $B_1$ ,  $C_1$ , and  $W$  can be described by a  
387 general linear model:

388 
$$B_1 = WC_1$$

389 We obtained the weight matrix through least-squares estimation:

390 
$$\hat{W} = B_1 C_1^T (C_1 C_1^T)^{-1}$$

391 In the test stage, we inverted the model to transform the observed test data  $B_2$  ( $m$  voxels  
392  $\times$   $n_2$  observations) into estimated channel responses,  $C_2$  ( $k$  channels  $\times$   $n_2$  observations),  
393 using the estimated weight matrix,  $\hat{W}$ , that we obtained in the training phase:

394 
$$\hat{C}_2 = (\hat{W}^T \hat{W})^{-1} \hat{W}^T B_2$$

395 Each estimated channel response function was then circularly shifted to a common center  
396 by aligning the estimated channel responses to the channel tuned for target location.

397 **Model training and testing.** We trained the IEM using independent mapping task  
398 data and tested the model using single trial search-task data (average of 4 to 10 TR's  
399 after search array onset). We then shifted and averaged the search task data so that like  
400 trials were aligned (e.g., rotate and average all trials with target-distractor distance of 90).  
401 To reduce idiosyncrasies of only having 1 test set, we iterated the analysis by leaving out  
402 1 block of training data and 1 block of test data, looping through all possible combinations

403 (e.g., for each 1 block of left out training data, we left out each possible block of test data  
404 on different runs of the loop).

405

## 406 **Results**

### 407 **Behavior**

408 Subjects performed a variant of the additional singleton search task (Theeuwes,  
409 1992) (Figure 1A) in which they searched for a target (diamond) among non-targets  
410 (circles). On each trial, the participant reported via button-press the orientation of the line  
411 inside the diamond target (vertical or horizontal). On 66.67% of trials, one of the non-  
412 targets was uniquely colored (“singleton distractor present”, e.g., one red distractor, two  
413 green non-targets, and one green target item). Behavioral capture was quantified as  
414 slowed response times (RTs) when the distractor was present versus absent. In addition  
415 to examining the basic capture effect, a key goal of this work was to examine modulation  
416 of capture by trial history (Vatterott and Vecera, 2012; Gaspelin et al., 2015, 2017). Prior  
417 work has shown that participants can learn to suppress a distractor (i.e., no RT difference  
418 for singleton distractor present versus absent trials) when the same distractor color or  
419 distractor location is repeated over many trials (Vatterott and Vecera, 2012; Gaspelin et  
420 al., 2015, 2017). Building on this work, we included two key task conditions in a  
421 counterbalanced, block-wise fashion to manipulate trial history and behavioral capture  
422 while using identical stimulus arrays (e.g., green target, red distractor). In the color  
423 constant condition (Figure 1A), the array colors stayed constant throughout the block  
424 (e.g., green target, green non-target items, red distractor). In the color variable condition  
425 (Figure 1B), the array colors randomly varied from trial to trial. Based on prior work, we  
426 expected robust capture in the color variable condition, and little or no capture in the color  
427 constant condition (Vatterott and Vecera, 2012; Gaspelin et al., 2015, 2017).

428

429

430

431

432

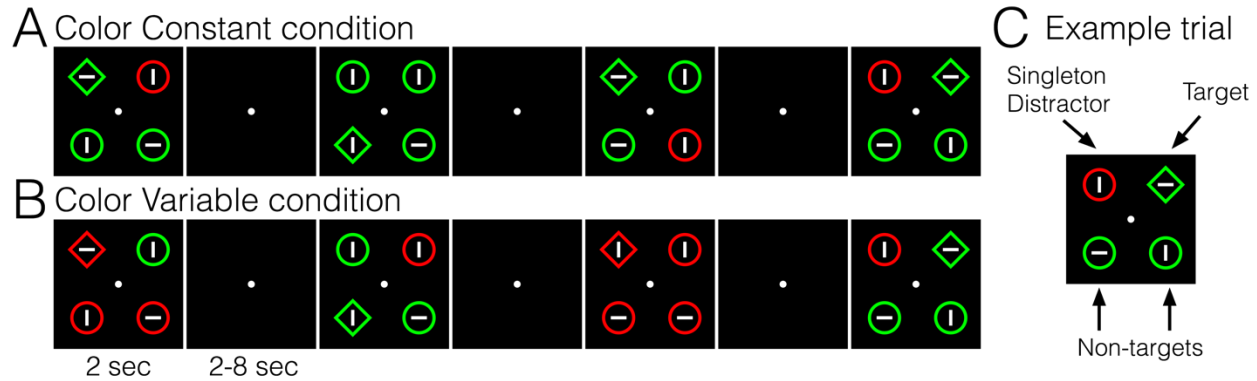

433

434 **Figure 1. Visual search task stimuli.** On each trial, participants viewed a 4-item array  
435 and reported the orientation of the line inside the diamond-shaped target (horizontal or  
436 vertical). **(A)** In the color constant condition, colors of targets and singleton distractors  
437 were fixed throughout the run. **(B)** In the color variable condition, colors of targets and  
438 singleton distractors swapped randomly from trial to trial. **(C)** An example trial with labels  
439 for the target, singleton distractor, and non-target items.  
440

441 Replicating prior work, we found significant behavioral capture that was modulated  
442 by trial history (Geyer et al., 2006; Vatterott and Vecera, 2012; Goschy et al., 2014;  
443 Gaspelin et al., 2015, 2017; Wang and Theeuwes, 2018a; Failing et al., 2019a). In our  
444 MRI sample (Exp 1a, Figure 2A & 2C), we observed significant behavioral capture in the  
445 color variable condition, with longer RT's for distractor present versus distractor absent  
446 trials ( $M = 32.8$  ms,  $SD = 25.5$  ms,  $p = .001$ ,  $d = 1.28$ ), but capture was not significant in  
447 the color constant condition ( $M = 10.8$  ms,  $SD = 18.5$  ms,  $p = .07$ ,  $d = .59$ ). Importantly,  
448 capture was significantly larger for color variable vs. color constant runs ( $p = .009$ ,  $d =$   
449  $.91$ ). We replicated this pattern of findings in the behavior-only experiment (Exp. 1b,  
450 Figure 2B & 2D), with robust capture for 'color variable' ( $p < 1 \times 10^{-5}$ ,  $d = 1.31$ ), no  
451 significant capture for 'color constant' ( $p = .1$ ,  $d = .32$ ), and larger capture for color variable  
452 vs. constant ( $p = .002$ ,  $d = .71$ ). Participants in both experiments were accurate overall  
453 ( $>90\%$ ), and there was no evidence of a speed-accuracy trade-off (Figure 2-1).

454 In addition to the key modulation of capture as a function of stimulus history, we  
455 also replicated prior findings that the degree of capture is significantly modulated by the  
456 physical distance between the target and the distractor (Mounts, 2000; Turatto and  
457 Galfano, 2001; Wang and Theeuwes, 2018a; Failing et al., 2019b), with larger capture for  
458 distractors nearer the target (Figure 2E-F). We ran a repeated measures ANOVA



459 including both experiments (n=36). Including Experiment as a factor revealed no  
460 experiment main effects or interactions ( $p > .2$ ), so the two experiments were combined  
461 for further analyses of the behavioral data (although Figure 2 shows data from the two  
462 experiments separately). There was a significant effect of Condition (larger capture for  
463 color variable than color constant),  $p < 1 \times 10^{-4}$ , a main effect of Distance (larger capture  
464 for 90° than 180°),  $p = .037$ ,  $\eta^2_p = .12$ , and an interaction between Condition and Distance  
465 (greater distance effect in the color variable condition),  $p = .014$ ,  $\eta^2_p = .16$ .  
466

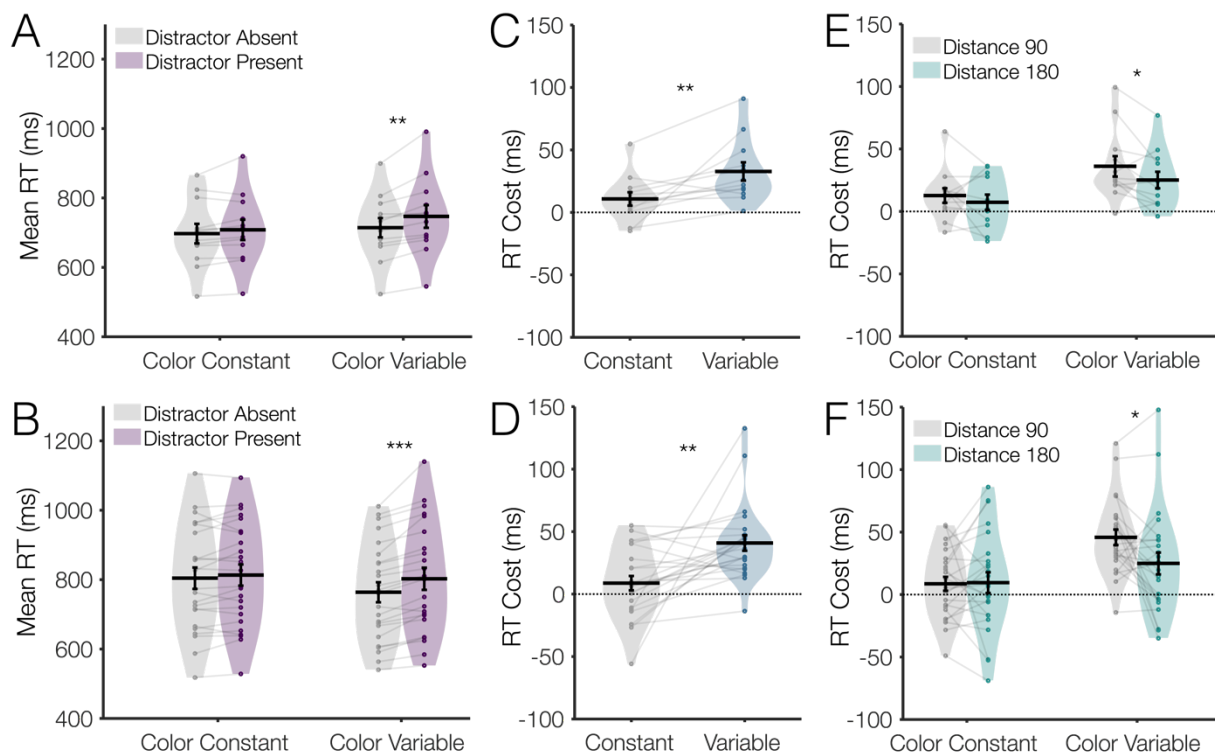

467

468 **Figure 2. Behavioral capture during the visual search task. (A)** In the main MRI  
469 Experiment (Exp 1a), participants were significantly captured by the salient singleton  
470 distractor in the color variable condition, but not in the color constant condition. **(B)** This  
471 pattern replicated in the behavior-only experiment (Exp 1b). **(C-D)** Capture costs (RT  
472 Difference for distractor present – absent trials) were significantly larger in the color  
473 variable than in the color constant condition in Exp 1a **(C)** and Exp 1b **(D)**. **(E-F)** Capture  
474 costs (RT Difference for distractor present – absent trials) were significantly modulated  
475 by the distance between the target and distractor in the color variable condition both in  
476 Exp 1a **(E)** and Exp 1b **(F)**. Violin plot shading shows range and distribution of the data;  
477 dots represent single subjects; black error bars indicate  $\pm 1$  SEM. Asterisks depict  
478 significance for uncorrected post-hoc comparisons between adjacent bars within each  
479 experiment, \*  $p < .05$ , \*\*  $p < .01$ , \*\*\*  $p < .001$ .

480 **fMRI results: Model estimates of spatial position in the independent mapping task**

481 We opted for a multivariate model-based approach to estimate the amount of  
482 information encoded in voxel activation patterns about each of the 4 stimuli in the search  
483 array, as such multivariate approaches are more sensitive than just computing the  
484 univariate mean response across all voxels (Cox and Savoy, 2003; Haynes and Rees,  
485 2005; Kamitani and Tong, 2005; Norman et al., 2006; Serences and Saproo, 2012; Tong  
486 and Pratte, 2012). For example, item-specific information has been observed using  
487 multivariate methods even in the absence of univariate changes (Lewis-Peacock and  
488 Postle, 2012; Emrich et al., 2013) (but for univariate analyses of the present data, see  
489 extended data Figure 3-1). We opted for an inverted encoding model (IEM) approach  
490 (Sprague et al., 2018a, 2019), as opposed to Bayesian or other decoders (van Bergen et  
491 al., 2015; van Bergen and Jehee, 2019), because this approach allowed us to easily  
492 derive a separate estimate of the information encoded about each of the 4 simultaneously  
493 presented items from the search array in the main analysis (Sprague et al., 2019). For  
494 further discussion of IEM model assumptions and best practices, see: (Sprague et al.,  
495 2018a, 2019).

496 In our key analyses of the fMRI data, we used an independent mapping task to  
497 train a model of spatial position from which we estimated the relative priority of all item  
498 positions within the visual search array. During the independent mapping task, observers  
499 viewed a flickering checkerboard wedge that was presented at 1 of 24 positions on an  
500 imaginary circle around fixation (Figure 3A). We first checked that we observed robust  
501 estimates of spatial position when training and testing within the independent mapping  
502 task (leave 1 run out, see section 'Inverted Encoding Model'). We observed robust model-  
503 based estimates of spatial position for all ROIs (Figure 3B). Parameters from the best-  
504 fitting von Mises distribution to each region-of-interest (ROI) are depicted in Figure 3C  
505 (model fits, linear classifier results, and von Mises parameters for shuffled data are shown  
506 in extended data Figure 3-2). There was an effect of ROI on precision such that spatial  
507 position was represented less precisely in later visual areas ( $p < 1 \times 10^{-5}$ , where precision  
508 is the concentration parameter  $\kappa$  of the best fitting von Mises, with higher values indicating  
509 a more precise function). There was also an effect of ROI on the amplitude and baseline

510 measures of the model-based estimates of spatial position ( $p < 1 \times 10^{-5}$ ), and all 3  
511 parameters significantly differed from zero across all ROIs ( $p < 1 \times 10^{-5}$ ). These results,  
512 particularly the observation of amplitudes greater than 0, confirmed that activation  
513 patterns in all examined regions encode information about spatial position.  
514

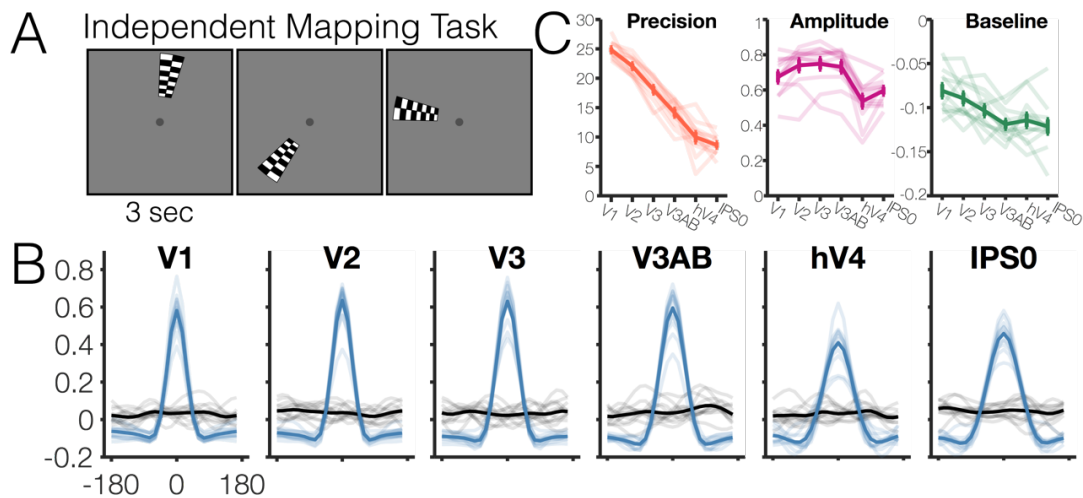

515

516 **Figure 3. Single-item model estimates training and testing within the independent**  
517 **mapping task. (A)** Independent mapping task used to train the model to estimate spatial  
518 position of 4 search array items. Participants viewed a flickering checkerboard which  
519 could appear at one of 24 positions around an imaginary circle. **(B)** Blue lines: Model  
520 estimates of viewed spatial position training and testing within the independent mapping  
521 task. Single-trial model estimates for each subject are aligned to 0 degrees and averaged.  
522 Black lines: Model estimates for shuffled training labels. Opaque lines = group average;  
523 semi-transparent lines = individual subjects. **(C)** Descriptive statistics for best fit von Mises  
524 parameters (precision [ $\kappa$ ], amplitude, baseline) to model estimates in panel B. Error bars  
525 indicate  $\pm 1$  SEM; the opaque line shows the group average; semi-transparent lines show  
526 individual subjects.

527

528 Unlike the single item model estimates that were derived based on the  
529 independent mapping task (Figure 3), we could not fit a simple, uni-modal Gaussian  
530 function to model-based estimates derived from the search task data because 4 peaks in  
531 the model output were expected – one for each item in the search array. As such, we first  
532 conducted simulations to ensure that we would be able to measure putative changes to  
533 individual item representations (e.g. target enhancement, distractor suppression), despite  
534 multiple item representations contributing to the aggregate 4-item model estimates. To

535 do so, we used data from the independent mapping task to generate predictions for  
536 observed model responses in a 4-item array. For each ROI, we took the 1-item model  
537 response derived from the independent mapping task, replicated this model response  
538 four times (once at each of the four search array positions), and took the average of all 4  
539 shifted 1-item model response lines to generate a single 4-item model prediction. In  
540 addition, we systematically varied the strength of the simulated response to each item to  
541 ensure that we were able to recover a corresponding change in the item-specific  
542 responses estimated from the aggregate 4-item model estimate (Figure 4; extended data  
543 Figure 4-1).

544         These simulations revealed clearly separable peaks for all four items in early areas  
545 like V1, where spatial precision is high (Figure 4A-B, left panel). In contrast, identifying  
546 clear peaks in later areas like IPS0 was difficult when the response to all items was  
547 equivalent (Figure 4A-B, right panel). However, if one item evoked a larger or smaller  
548 response than the other items, as would be expected with target enhancement or  
549 distractor suppression, then clear and measurable changes to the aggregate 4-item  
550 model estimates emerged (Figure 4C). Further simulations showed that we could detect  
551 smaller changes to one item (e.g., distractor suppression) in the presence of larger  
552 changes to another item (e.g., target) by measuring the response amplitude at each  
553 expected item's peak. In V1, this is clearly seen in the peak response to each item; in  
554 later areas such as IPS0, such changes manifest as a large central peak that is skewed  
555 by the neighboring items' smaller changes (Figure 4D).

556         We also used a general linear model (GLM) to estimate best-fitting gain factors for  
557 each of the 4 hypothesized item representations by fitting an aggregate function and  
558 allowing one parameter in the GLM to scale the response associated with each item. This  
559 is essentially the inverse of the simulations described above: For a given aggregate  
560 response (i.e., the response of each of the 24 spatial channels when shown a given 4-  
561 item search array), we used a non-negative least squares solution (Lawson and Hanson,  
562 1974) to estimate the contribution of each of the 4 item positions (calculated from the 1-  
563 item localizer task) to the observed 4-item search array response (Figure 4E). This  
564 analysis yielded similar results to the simple approach of comparing the height at each

565 expected item peak (extended data Figure 5-4). Thus, using either the raw amplitude at  
 566 expected peaks or a GLM-based approach, we determined that we should be able to  
 567 accurately characterize situations in which there was no modulation of target and  
 568 distractor responses as well as situations in which there was a significant modulation of  
 569 target and/or distractor responses.  
 570

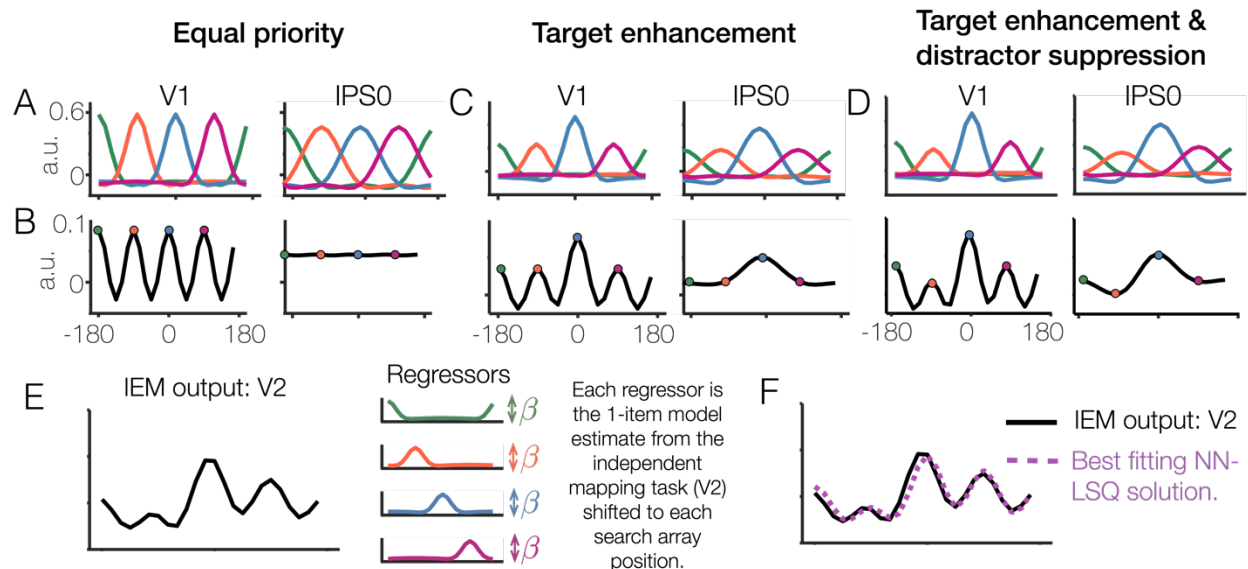

571  
 572 **Figure 4. Generating predictions for 4-item model estimates by averaging single-**  
 573 **item model estimates from the independent mapping task. (A)** Average from the  
 574 independent mapping task plotted at 4 hypothetical item locations. Here, these 4 “items”  
 575 are represented with equal priority. (B) Hypothetical observed response when measuring  
 576 a single trial containing the 4 items presented simultaneously. This line is the average of  
 577 all lines in Panel A. (C) The same as panels A and B, but with the item at position 0  
 578 assigned a higher response amplitude than the other three items. (D) The same panels  
 579 as A and B, but with both an enhanced item at position 0 and a suppressed item at position  
 580 -90. (E) Actual IEM model output for 4-item search arrays in V2 (Target plotted at 0,  
 581 distractor plotted at -90). To estimate the strength of each of the 4 underlying item  
 582 representations, one can simply measure the height (a.u.) at expected item peaks (i.e., -  
 583 180, -90, 0, and 90). Alternatively, one may use a non-negative least squares solution  
 584 to estimate weights for a regressor for each of the 4 item positions. Each regressor is the 1-  
 585 item IEM output from the independent mapping task within the same region (e.g., V2),  
 586 shifted to the appropriate item location. (F) Example IEM output and best-fitting non-  
 587 negative least squares solution with 4 item regressors.  
 588

589

590

591 **Analysis of search array locations in V1, V2, V3, V3AB, hV4, and IPS0.**

592           Given that we can assess differential responses associated with each of the 4  
593 items in the search array (Figure 4), we next tested whether goal- and history-driven  
594 modulations were differentially represented across the visual stream by performing an  
595 analysis of history-driven effects on target and distractor processing across visual ROIs  
596 (Figure 5). These six ROIs (V1, V2, V3, V3AB, hV4 and IPS0) were chosen for each  
597 participant having at least 90 spatially selective voxels as determined by the localizer  
598 data. Here, we focus on history-driven effects on target processing and distractor  
599 processing for the arrays where behavioral and neural distractor competition effects were  
600 greatest (target-distractor separation  $\pm 90^\circ$ , see Figure 2E,F). Full ANOVA results and  
601 additional plots are shown for individual ROIs with both array  $90^\circ$  and  $180^\circ$   
602 configurations in extended data Figures 5-4 and 5-5.

603

604

605

606

607

608

609

610

611

612

613

614

615

616

617

618

619

620



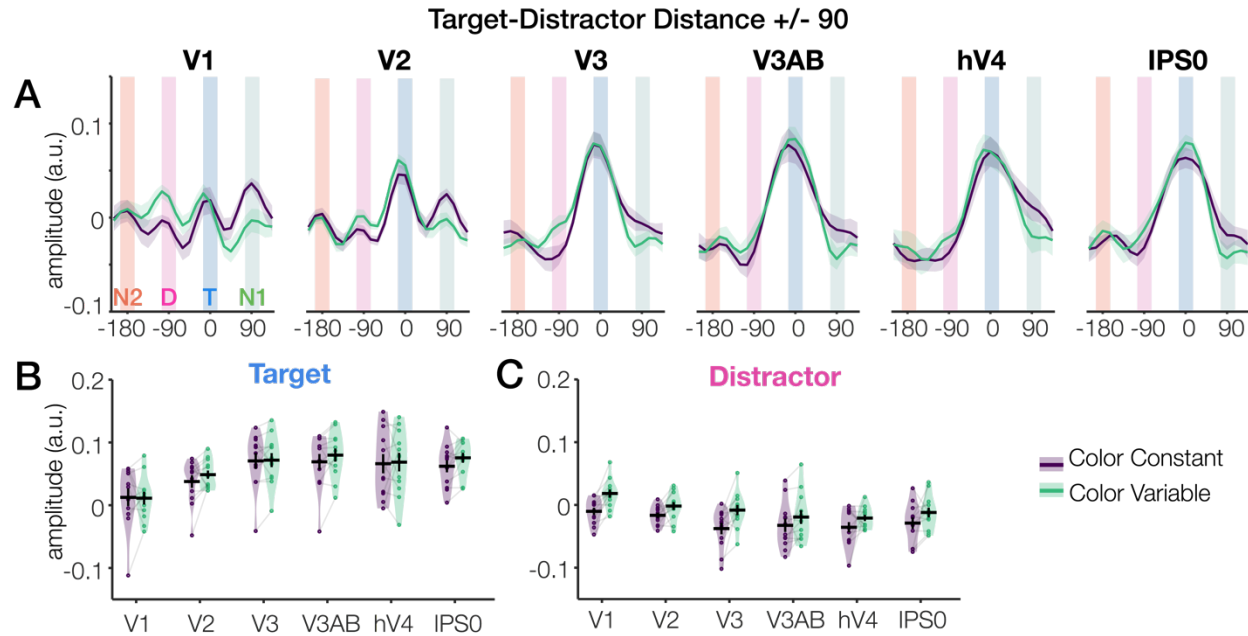

621

622 **Figure 5. Dissociable effects of stimulus history on target enhancement and**  
623 **distractor suppression.** (A) Model responses for individual ROIs as a function of task  
624 condition (Arrays with target-distractor distance +/-90). Purple and green lines (Shaded  
625 error bars = 1 SEM) show the output of the inverted encoding model in the color constant  
626 and color variable conditions, respectively. Background panels at -180°, -90°, 0° and +90°  
627 show the positions of the 4 search array items (blue = target (T), pink = distractor (D),  
628 green = non-target 1 (N1), orange = non-target 2 (N2)). Target enhancement can be seen  
629 as the greater height at position 0: The IEM peak at the blue bar is higher than the IEM  
630 peak at the orange, pink, and green bars. History-driven distractor suppression can be  
631 seen as the lower height at position -90 for the color constant vs. color variable conditions:  
632 The IEM peak at the pink bar is higher for the green line than for the purple line. (B) Target  
633 amplitude as a function of ROI and task condition. There was no effect of task condition  
634 on target amplitude, but a significant increase in target amplitude across ROIs. Violin plot  
635 shading shows range and distribution of the data; dots represent single subjects; black  
636 error bars indicate ±1 SEM. (C) Distractor amplitude as a function of ROI and task  
637 condition. There was a significant effect of task condition on distractor amplitude, and this  
638 history-driven effect did not interact with ROI.  
639

640 We found evidence for within-display target enhancement (i.e., enhancement of  
641 the target over other positions), but we did not find evidence for history-driven  
642 modulations of target enhancement. Overall target enhancement was significant in all  
643 ROIs (all  $p$ 's < .001) except for V1 ( $p$ 's > .12), and target enhancement significantly  
644 increased across ROIs ( $p$  < .001) as shown in Figure 5A-B. There was, however, no  
645 meaningful effect of history on target amplitude as revealed by a repeated-measures



646 ANOVA testing the main effect of history and the interaction between history and ROI on  
647 target processing ( $p = .35$ ,  $\eta^2_p = .08$ ;  $p = .64$ ,  $\eta^2_p = .04$  for main effect and interaction  
648 respectively). This pattern was the same whether we used raw amplitude values or we  
649 used values from the GLM (no effect of history,  $p = .28$ , no interaction of history and ROI,  
650  $p = .51$ ).

651 In contrast, history had a significant effect on distractor amplitude such that  
652 distractor amplitudes were significantly attenuated in the color constant condition relative  
653 to the color variable condition. A repeated-measures ANOVA revealed a main effect of  
654 history ( $p = .007$ ,  $\eta^2_p = .50$ ) and no interaction between history and ROI ( $p = .44$ ,  $\eta^2_p =$   
655  $.08$ ), indicating that the effect of history on distractor processing was similar throughout  
656 the examined ROIs. Though the ANOVA suggests that history effects were of a similar  
657 magnitude across all examined ROIs, a post-hoc simple main effects analysis showed  
658 that the effect was individually significant only in V1 ( $p < .001$ ) and V3 ( $p < .01$ ). This  
659 general pattern was the same whether we used raw amplitude values or else used values  
660 from the GLM approach (main effect of history,  $p = .01$ ,  $\eta^2_p = .47$ , no interaction of history  
661 and ROI,  $p = .87$ ,  $\eta^2_p = .03$ ).

662 Finally, we examined changes in non-target responses. For “non-target 1” (the item  
663 neighboring the target on the side opposite the distractor), there was an overall history  
664 related modulation (color constant > color variable,  $p = .016$ ,  $\eta^2_p = .42$ ) that did not interact  
665 with ROI ( $p = .76$ ,  $\eta^2_p = .03$ ). Similar general effects on non-target processing have been  
666 observed recently (Won et al., 2020) and may reflect a bias of attention away from the  
667 distractor such that attention may ‘overshoot’ the target because of the reduction in signal  
668 at the distractor location. The effect of history on “non-target 1” responses likewise was  
669 similar though of borderline significance in the GLM analysis (color constant > color  
670 variable,  $p = .049$ ,  $\eta^2_p = .31$ ). We found no effect of history on the other non-target (“non-  
671 target 2”) which occupied the spatial position 180 degrees from the target item ( $p \geq .61$ ).

672 Finally, additional analyses on larger, aggregate ROIs (V1-V3, IPS0-3) yield  
673 convergent results and also demonstrate how distractor suppression effects were absent  
674 for arrays where the target and distractor did not compete with each other (target-  
675 distractor separation +/- 180°), consistent with our separate analysis of each ROI (Figure

676 6) and prior behavioral and neural findings (Turatto and Galfano, 2001; Wang and  
677 Theeuwes, 2018a; Failing et al., 2019b; Won et al., 2020) (extended data Figures 5-1, 5-  
678 2, and 5-3).

679

680

### Discussion

681 To find what we are looking for, we must integrate information about stimulus  
682 relevance, salience, and history. While the impact of stimulus relevance and salience on  
683 topographically organized population codes have been thoroughly investigated, stimulus  
684 history is not thought to be a wholly goal-driven or stimulus-driven process. Rather, history  
685 effects may depend on interactions between the current stimulus drive ('bottom-up' factor)  
686 and the current internal state of the visual system ('top-down' factor). To address this  
687 ambiguity and to better understand how history impacts visual processing, we tested  
688 whether history-driven changes to attentional priority operate in a manner akin to  
689 canonically goal-driven and/or to stimulus-driven signatures of priority. To do so, we  
690 estimated population-level neural responses evoked by 4-item search arrays across  
691 retinotopically-defined areas of occipital and parietal cortex. We found that stimulus  
692 history did not modulate the specificity of goal-driven target templates, as goal-driven  
693 target enhancement was unaffected by stimulus history. Instead, we found that stimulus  
694 history attenuated responses related to distractors throughout the visual hierarchy. These  
695 results suggest that stimulus history may influence visual search performance via local  
696 competitive interactions within early sensory cortex (i.e., V1), consistent with the V1  
697 salience map hypothesis. Further, we argue that these early competitive interactions  
698 cannot be explained by goal-driven predictive coding models.

699

### 700 **Proposed model: Adaptation alters a stimulus-driven salience map in V1**

701 Models of image-computable salience propose that local image statistics  
702 determine competitive interactions that give rise to 2D spatial salience maps within V1  
703 (Li, 2002; Zhang et al., 2012) or after integrating feature maps at a later stage of  
704 processing (e.g., Treisman and Gelade, 1980; Wolfe, 1994; Itti and Koch, 2000; Carmi  
705 and Itti, 2006), and these models do not typically account for the long-term effects of

706 stimulus history. Note, many existing saliency models do account for *short-term* changes  
707 to stimuli by coding for dynamic image factors such as motion velocity and flicker (i.e.,  
708 luminance onset or offset) across movie frames (~30 ms per frame), (Itti and Koch, 2000;  
709 Carmi and Itti, 2006). However, these dynamic feature maps cannot explain history  
710 effects that build up over the course of many trials and persist across blank inter-trial  
711 intervals. Rather, an additional mechanism is needed to integrate stimulus information  
712 over a longer duration. Recent work suggests that neural adaptation – which is linked to  
713 the history of prior stimuli – in a subset of tuned neurons may alter stimulus-driven  
714 competitive dynamics (e.g., divisive normalization, Carandini and Heeger, 2012) within  
715 early visual cortex (Solomon and Kohn, 2014). Thus, to accommodate our observation of  
716 history-driven distractor suppression within existing saliency models, we propose that  
717 stimulus-driven evoked responses in V1 may be integrated over a longer, multi-trial  
718 duration (as opposed to just within a single image; Figure 6) (Karni and Sagi, 1991;  
719 Schwartz et al., 2002; Jehee et al., 2012). In the context of models of visual search, this  
720 might be comprised of a series of 2D spatial maps that together form a temporally  
721 integrated 3D salience map (i.e., salience is computed based on current and prior  
722 physical stimulus properties). Consistent with the notion of a 3D salience map, recent  
723 behavioral and neural evidence suggests a role for priming and habituation in visual  
724 search behaviors (Geyer et al., 2006; Feldmann-Wüstefeld and Schubö, 2016; Turatto  
725 and Pascucci, 2016; Turatto et al., 2018; Won and Geng, 2020, also see: Reavis et al.,  
726 2016), even when the adapting stimuli are task-irrelevant.

727

728

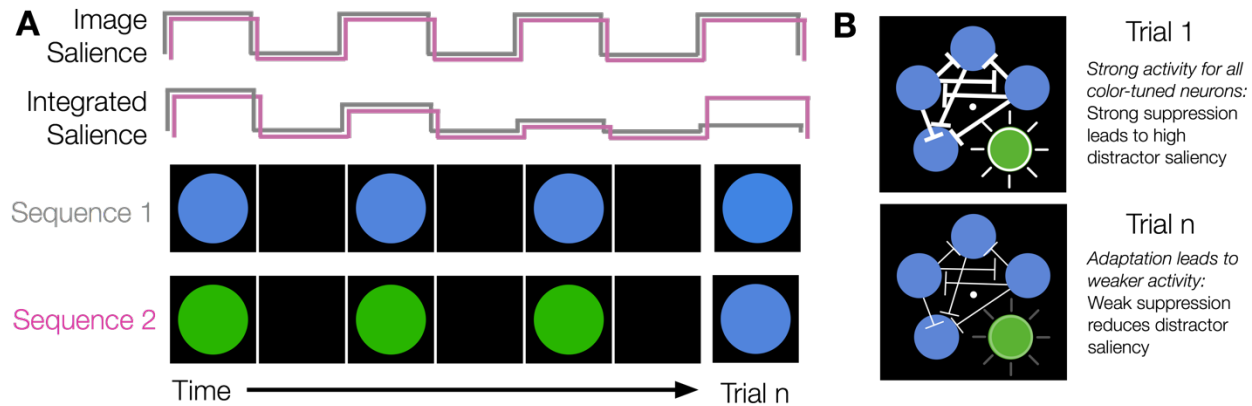

729  
730 **Figure 6. Simplified cartoon illustration of local-image versus temporal-integration**  
731 **saliency for a simple image with one feature and location.** (A) In 2-D saliency  
732 computations, stimulus-driven stimulus drive is determined locally within a given image  
733 without respect to prior images. Sequence 1 is 4 different trials, and on each trial the  
734 same stimulus is shown (Blue-Blue-Blue-Blue). Sequence 2 is 4 different trials, but the  
735 final trial is a different color from the preceding trials (Green-Green-Green-Blue). The final  
736 trial (Blue) is physically identical for the two sequences. So, the final stimuli (trial  $n$  in each  
737 sequence) have identical 2-D saliency. Assuming that we chose equiluminant green and  
738 blue values, then each “frame” in the sequence likewise has approximately the same  
739 image-computable saliency, as shown by the uniform-sized square pulses in the cartoon.  
740 Alternatively, stimulus-driven saliency maps may better be conceived of as reflecting a  
741 temporally-integrated 3-D saliency map, as early sensory neurons adapt to ongoing  
742 stimulus features. In Sequence 1 (Blue-Blue-Blue-Blue), the activity of neurons that are  
743 maximally responsive to blue wanes due to adaptation. In Sequence 2 the activity of  
744 neurons maximally responsive to green wanes over the first 3 trials, but the final stimulus  
745 elicits a robust response from the non-adapted blue-preferring neurons. Thus, temporally-  
746 integrated saliency for the trial  $n$  in each sequence differs across the two sequences even  
747 though the stimuli are physically identical. (B) Most studies of predictive coding and  
748 adaptation consider changes to neural activity for a single item. Here, we illustrate how  
749 adaptation can have consequences for stimulus-driven saliency that arises from inter-  
750 item competition within multi-item arrays (e.g., Itti and Koch, 2000). Top: For the first  
751 presentation of the array, all neurons respond strongly, leading to classic inter-item  
752 competition effects that yield high distractor saliency. Bottom: With repeated  
753 presentations and adaptation, overall activity and inter-item competition is weakened,  
754 yielding a relative attenuation of the distractor.

755  
756 Consistent with a temporally-integrated V1 saliency account of history-driven  
757 distractor suppression, we observed history-driven modulations only with sufficient  
758 competition (i.e., targets and distractors were closer together) and we observed robust  
759 history-driven modulations in V1 in the absence of goal-driven modulations. In line with  
760 our findings, prior behavioral work has shown that incidental repetitions of distractor, but

761 not target, features and locations modulate search performance (Geyer et al., 2006;  
762 Failing et al., 2019b). Likewise, prior work has shown a rapid suppression of distractor-  
763 evoked neural responses (Hickey et al., 2009; Zhang and Luck, 2009; Sawaki and Luck,  
764 2010; Gaspar and McDonald, 2014; Moher et al., 2014; Gaspelin et al., 2015, 2017) and  
765 that the likelihood of distraction results in anticipatory changes to distractor, but not target,  
766 locations (Serences et al., 2004; Heuer and Schubö, 2019; Won et al., 2020). However,  
767 the proposed temporally-integrated salience account does not capture all history-driven  
768 effects. In our task, the repeated distractor features were purely visual in nature, and thus  
769 history effects might be mediated entirely via local circuit dynamics (i.e., the adaptation  
770 account described above). In contrast, other studies have examined history-driven effects  
771 for more abstract features like reward (Mazer and Gallant, 2003; Serences, 2008; Saproo  
772 and Serences, 2010; Stanisor et al., 2013; Chelazzi et al., 2014; Hickey and Peelen, 2015;  
773 MacLean and Giesbrecht, 2015; Itthipuripat et al., 2019; Kim and Anderson, 2019) (but  
774 also see: Maunsell, 2004; Anderson and Kim, 2019), which may require an intermediary  
775 pathway such as the medial-temporal lobe (Theeuwes, 2019) or dopaminergic midbrain  
776 structures (Hickey and Peelen, 2015, 2017).

777

### 778 **Implications for predictive coding theories of visual processing**

779 Much of the debate about history-driven changes to visual search has been  
780 separated from the predictive coding literature, but these two ideas are highly intertwined.  
781 Predictive coding theories propose that incoming visual information is compared to  
782 expected visual information at later stages of processing (Rao and Ballard, 1999; Friston,  
783 2005; Summerfield and de Lange, 2014; Spratling, 2017). Efficient, predictive coding is  
784 achieved via an iterative updating process whereby error units detect deviations from  
785 what is expected and inhibit expected information in the prediction units at an earlier stage  
786 of processing. Here, we consider whether an expectation-driven predictive coding  
787 account, whereby top-down expectations about the upcoming stimulus influence neural  
788 processing, could likewise explain the pattern of results that we have observed. We note  
789 that the term “predictive coding” has been used in a wide variety of ways in the literature  
790 (Spratling, 2017), some of which are entirely stimulus-driven (e.g., within the retina;

791 Srinivasan et al., 1982). Here, we are concerned with considering versions of predictive  
792 coding whereby top-down expectations influence stimulus processing.

793 A fundamental tension has long been noted in the literature: Predictive coding  
794 models primarily explain how expected information becomes *attenuated*, and thus have  
795 difficulty explaining signal enhancement related to attention (e.g., Luck et al., 1997; Hupé  
796 et al., 1998; Kastner and Ungerleider, 2000). Many predictive coding models implement  
797 error-driven feedback as inhibitory signaling from the next adjacent visual area (e.g., V3  
798 to V2). To explain top-down attentional prioritization effects, predictive coding models  
799 must be modified, as has been done in the Predictive Coding/ Biased Competition  
800 (PC/BC) model (Spratling, 2008). In this model, an additional top-down attention  
801 component is added, and the error and prediction units are shifted such that error-driven  
802 feedback is excitatory. These changes to the model allow for biased competition effects  
803 to arise within a predictive coding framework.

804 Although the PC/BC model variants can predict biased competition effects in  
805 attention, such models critically predict that target enhancement and distractor  
806 suppression effects will be yoked, as both effects arise from feedback from the next higher  
807 level of visual processing. Thus, for existing predictive coding models to explain our  
808 results, we should have observed that the emergence of history-driven distractor  
809 suppression paralleled top-down target enhancement. In contrast, we found diverging  
810 target enhancement and history-driven distractor suppression effects: whereas target  
811 enhancement was absent in V1 and increased across the visual stream, history-driven  
812 distractor suppression emerged in V1. Thus, we propose that history-driven distractor  
813 suppression is best explained by ‘bottom-up’ inter-trial priming arising from adaptation  
814 within V1 (Westerberg et al., 2019).

815 Furthermore, we argue that it is important to differentiate between “bottom-up” and  
816 “top-down” expectational effects, analogous to recent arguments that it is critical to  
817 differentiate between potential confounds of attention and expectation (Summerfield and  
818 de Lange, 2014; Rungratsameetaweemana and Serences, 2019). We define ‘top-down’  
819 expectations as those that can be updated flexibly and on a rapid time scale (e.g., over  
820 the course of a few trials). In contrast, we define ‘bottom-up’ expectations as those that



821 are ingrained over a very long time-scale and tied to particular stimuli. For example, early  
822 ideas about predictive coding emerged from studies of the retina: By exploiting long-term  
823 ‘expectations’ that naturalistic stimuli are correlated in space and time, coding within the  
824 retina can be highly efficient (Srinivasan et al., 1982; Rao and Ballard, 1999).

825 Making a distinction between ‘bottom-up’ and top-down’ expectations can explain  
826 prior results that run counter to some predictive coding models. Specifically, Maljkovic  
827 and Nakayama’s (1994) priming of pop-out experiments demonstrated that RT costs are  
828 incurred by switching stimuli even when the stimulus switch is expected. When a stimulus  
829 is predictable and repeated (e.g., 0% probability of a color switch), participants are faster  
830 than when a stimulus is unpredictable and switches color (e.g., 50% probability of a color  
831 switch. If expectations can attenuate the cost of switching colors, then participants should  
832 likewise be faster in a predictable, 100% switch condition than in the unpredictable 50%  
833 switch condition. In contrast to this prediction, Maljkovic & Nakayama found that  
834 participants were *slower* in the 100% switch condition: Participants apparently were  
835 unable to use their expectations to overcome bottom-up stimulus-driven priming effects.

836

### 837 **Goal-driven attention effects**

838 In addition to implicating early visual cortex in representing history-driven task  
839 factors during visual search, we also replicated prior findings that the locations of attended  
840 items (here, search targets) are prioritized relative to other item locations in both visual  
841 and parietal cortex (Saproo and Serences, 2010; Sprague and Serences, 2013; Sprague  
842 et al., 2018b). These target-related modulations are consistent with the broad involvement  
843 of visually-responsive regions in representing goal-driven priority during visual search  
844 (Mazer and Gallant, 2003; Ogawa and Komatsu, 2006). For example, recent studies  
845 manipulated the salience (contrast) and relevance (attended or unattended) of items and  
846 found that salience and relevance were both represented, to varying degrees, across the  
847 visual hierarchy (Poltoratski et al., 2017; Sprague et al., 2018b). Notably, however, here  
848 we found that target prioritization was absent in V1, whereas prior work has found robust  
849 effects of attention in V1 (Motter, 1993; Kastner, 1998; Tootell et al., 1998; Gandhi et al.,  
850 1999; Kastner et al., 1999; Somers et al., 1999; Serences and Yantis, 2007; Saproo and



851 Serences, 2010; Sprague and Serences, 2013). This difference may reflect task  
852 differences — much prior work found attention-related gains in V1 when spatial attention  
853 was cued in advance or a single target was shown, whereas visual search arrays provide  
854 visual drive at many competing locations and spatial attention is deployed only after array  
855 onset. As such, further work may be needed to unconfound history effects and attention  
856 effects in the study of spatial attention, as much early work on univariate attention effects  
857 has employed blocked designs where the same location is attended for many trials in a  
858 row (Kastner, 1998; Tootell et al., 1998; Gandhi et al., 1999; Kastner et al., 1999; Somers  
859 et al., 1999).

860

### 861 **Future directions**

862 Although our work suggests that stimulus history modulates representations of  
863 distractor but not target processing in visual cortex, there are some potential limitations  
864 to the current design that suggest avenues for future work. First, because we measured  
865 only location, we could not directly measure suppression of the distractor color (Failing et  
866 al., 2019a). However, as the spatial position of the distractor was completely  
867 unpredictable, our results do strongly imply that the distractor color was suppressed.  
868 Likewise, most theories of visual search hypothesize that space is the critical binding  
869 medium through which feature and goal maps are integrated (Treisman and Gelade,  
870 1980; Wolfe, 1994; Itti and Koch, 2000), and recent work suggests that location is  
871 spontaneously encoded even when only non-spatial features such as color are task-  
872 relevant (Foster et al., 2017a). Second, it is possible that history may modulate both  
873 distractor- and target-processing in other circumstances not tested here. That is, perhaps  
874 the target template ‘diamond’ in our task was sufficiently useful such that adding feature  
875 information to this template (e.g., ‘red diamond’ rather than ‘diamond’) did not confer a  
876 behavioral advantage (but see: Maljkovic and Nakayama, 1994). Finally, the time-course  
877 of MRI (sampling every 800 ms) is slower than shifts of spatial attention to the search  
878 target (< 500 ms) (Foster et al., 2017b). Although the history-driven effects that we  
879 observed in visual cortex are consistent with the rapid distractor suppression effects  
880 observed in EEG (Sawaki and Luck, 2010; Gaspar and McDonald, 2014), we cannot

881 definitively say on the basis of these data that the observed history-driven effects  
882 occurred rapidly and directly within visual cortex versus via recurrent feedback from later  
883 visual areas. Nonetheless, the present work is consistent with and provides critical initial  
884 evidence for such a model.

885 **References**

- 886 Anderson BA, Kim H (2019) On the relationship between value-driven and stimulus-driven attentional  
887 capture. *Atten Percept Psychophys* 81:607–613.
- 888 Andersson JLR, Skare S, Ashburner J (2003) How to correct susceptibility distortions in spin-echo echo-  
889 planar images: application to diffusion tensor imaging. *NeuroImage* 20:870–888.
- 890 Arita JT, Carlisle NB, Woodman GF (2012) Templates for rejection: Configuring attention to ignore task-  
891 irrelevant features. *Journal of Experimental Psychology: Human Perception and Performance*  
892 38:580–584.
- 893 Awh E, Belopolsky AV, Theeuwes J (2012) Top-down versus bottom-up attentional control: a failed  
894 theoretical dichotomy. *Trends in Cognitive Sciences* 16:437–443.
- 895 Beck VM, Hollingworth A (2015) Evidence for negative feature guidance in visual search is explained by  
896 spatial recoding. *Journal of Experimental Psychology: Human Perception and Performance*  
897 41:1190–1196.
- 898 Beck VM, Hollingworth A, Luck SJ (2012) Simultaneous Control of Attention by Multiple Working Memory  
899 Representations. *Psychol Sci* 23:887–898.
- 900 Becker MW, Hemsteger S, Peltier C (2015) No templates for rejection: a failure to configure attention to  
901 ignore task-irrelevant features. *Visual Cognition* 23:1150–1167.
- 902 Bisley JW, Mirpour K (2019) The neural instantiation of a priority map. *Current Opinion in Psychology*  
903 29:108–112.
- 904 Bogler C, Bode S, Haynes J-D (2011) Decoding Successive Computational Stages of Saliency  
905 Processing. *Current Biology* 21:1667–1671.
- 906 Brainard DH (1997) The Psychophysics Toolbox. *Spat Vis* 10:433–436.
- 907 Brouwer GJ, Heeger DJ (2009) Decoding and Reconstructing Color from Responses in Human Visual  
908 Cortex. *Journal of Neuroscience* 29:13992–14003.
- 909 Carandini M, Heeger DJ (2012) Normalization as a canonical neural computation. *Nat Rev Neurosci*  
910 13:51–62.
- 911 Carlisle NB, Arita JT, Pardo D, Woodman GF (2011) Attentional Templates in Visual Working Memory.  
912 *Journal of Neuroscience* 31:9315–9322.
- 913 Carmi R, Itti L (2006) Visual causes versus correlates of attentional selection in dynamic scenes. *Vision*  
914 *Research* 46:4333–4345.

## HISTORY MODULATES DISTRACTORS

32

- 915 Chelazzi L, Eštočinová J, Calletti R, Lo Gerfo E, Sani I, Della Libera C (2014) Altering Spatial Priority  
916 Maps via Reward-Based Learning. *Journal of Neuroscience* 34:8594–8604.
- 917 Conci M, Deichsel C, Müller HJ, Töllner T (2019) Feature guidance by negative attentional templates  
918 depends on search difficulty. *Visual Cognition* 27:317–326.
- 919 Cox DD, Savoy RL (2003) Functional magnetic resonance imaging (fMRI) “brain reading”: detecting and  
920 classifying distributed patterns of fMRI activity in human visual cortex. *NeuroImage* 19:261–270.
- 921 Dale AM, Fischl B, Sereno MI (1999) Cortical Surface-Based Analysis. *NeuroImage* 9:179–194.
- 922 Desimone R, Duncan J (1995) Neural Mechanisms of Selective Visual Attention. *Annu Rev Neurosci*  
923 18:193–222.
- 924 Downing PE (2000) Interactions Between Visual Working Memory and Selective Attention. *Psychol Sci*  
925 11:467–473.
- 926 Emrich SM, Riggall AC, LaRocque JJ, Postle BR (2013) Distributed Patterns of Activity in Sensory Cortex  
927 Reflect the Precision of Multiple Items Maintained in Visual Short-Term Memory. *Journal of*  
928 *Neuroscience* 33:6516–6523.
- 929 Engel SA, Furmanski CS (2001) Selective Adaptation to Color Contrast in Human Primary Visual Cortex.  
930 *J Neurosci* 21:3949–3954.
- 931 Engel SA, Rumelhart DE, Wandell BA, Lee AT, Glover GH, Chichilnisky E-J, Shadlen MN (1994) fMRI of  
932 human visual cortex. *Nature* 369:525–525.
- 933 Failing M, Feldmann-Wüstefeld T, Wang B, Olivers C, Theeuwes J (2019a) Statistical regularities induce  
934 spatial as well as feature-specific suppression. *Journal of Experimental Psychology: Human*  
935 *Perception and Performance* 45:1291–1303.
- 936 Failing M, Wang B, Theeuwes J (2019b) Spatial suppression due to statistical regularities is driven by  
937 distractor suppression not by target activation. *Atten Percept Psychophys* 81:1405–1414.
- 938 Fecteau J, Munoz D (2006) Saliency, relevance, and firing: a priority map for target selection. *Trends in*  
939 *Cognitive Sciences* 10:382–390.
- 940 Feldmann-Wüstefeld T, Schubö A (2016) Intertrial priming due to distractor repetition is eliminated in  
941 homogeneous contexts. *Atten Percept Psychophys* 78:1935–1947.
- 942 Foster JJ, Bsales EM, Jaffe RJ, Awh E (2017a) Alpha-Band Activity Reveals Spontaneous  
943 Representations of Spatial Position in Visual Working Memory. *Current Biology* 27:3216-3223.e6.
- 944 Foster JJ, Sutterer DW, Serences JT, Vogel EK, Awh E (2017b) Alpha-Band Oscillations Enable Spatially  
945 and Temporally Resolved Tracking of Covert Spatial Attention. *Psychological Science* 28:929–  
946 941.
- 947 Friston K (2005) A theory of cortical responses. *Phil Trans R Soc B* 360:815–836.
- 948 Gandhi SP, Heeger DJ, Boynton GM (1999) Spatial attention affects brain activity in human primary  
949 visual cortex. *Proceedings of the National Academy of Sciences* 96:3314–3319.

## HISTORY MODULATES DISTRACTORS

33

- 950 Gardner JL, Sun P, Waggoner RA, Ueno K, Tanaka K, Cheng K (2005) Contrast Adaptation and  
951 Representation in Human Early Visual Cortex. *Neuron* 47:607–620.
- 952 Gaspar JM, McDonald JJ (2014) Suppression of Salient Objects Prevents Distraction in Visual Search.  
953 *Journal of Neuroscience* 34:5658–5666.
- 954 Gaspelin N, Leonard CJ, Luck SJ (2015) Direct Evidence for Active Suppression of Salient-but-Irrelevant  
955 Sensory Inputs. *Psychol Sci* 26:1740–1750.
- 956 Gaspelin N, Leonard CJ, Luck SJ (2017) Suppression of overt attentional capture by salient-but-irrelevant  
957 color singletons. *Attention, Perception, & Psychophysics* 79:45–62.
- 958 Gaspelin N, Luck SJ (2018) Distinguishing among potential mechanisms of singleton suppression.  
959 *Journal of Experimental Psychology: Human Perception and Performance* 44:626–644.
- 960 Geng JJ (2014) Attentional Mechanisms of Distractor Suppression. *Curr Dir Psychol Sci* 23:147–153.
- 961 Geng JJ, Won B-Y, Carlisle NB (2019) Distractor Ignoring: Strategies, Learning, and Passive Filtering.  
962 *Curr Dir Psychol Sci* 28:600–606.
- 963 Geyer T, Müller HJ, Krummenacher J (2006) Cross-trial priming in visual search for singleton conjunction  
964 targets: Role of repeated target and distractor features. *Perception & Psychophysics* 68:736–749.
- 965 Goschy H, Bakos S, Müller HJ, Zehetleitner M (2014) Probability cueing of distractor locations: both  
966 intertrial facilitation and statistical learning mediate interference reduction. *Front Psychol* 5  
967 Available at: <http://journal.frontiersin.org/article/10.3389/fpsyg.2014.01195/abstract> [Accessed  
968 September 8, 2020].
- 969 Greve DN, Fischl B (2009) Accurate and robust brain image alignment using boundary-based registration.  
970 *NeuroImage* 48:63–72.
- 971 Grill-Spector K, Malach R (2001) fMR-adaptation: a tool for studying the functional properties of human  
972 cortical neurons. *Acta Psychologica* 107:293–321.
- 973 Haynes J-D, Rees G (2005) Predicting the orientation of invisible stimuli from activity in human primary  
974 visual cortex. *Nat Neurosci* 8:686–691.
- 975 Heuer A, Schubö A (2019) Cueing distraction: electrophysiological evidence for anticipatory active  
976 suppression of distractor location. *Psychological Research* Available at:  
977 <http://link.springer.com/10.1007/s00426-019-01211-4> [Accessed September 8, 2020].
- 978 Hickey C, Di Lollo V, McDonald JJ (2009) Electrophysiological Indices of Target and Distractor  
979 Processing in Visual Search. *Journal of Cognitive Neuroscience* 21:760–775.
- 980 Hickey C, Peelen MV (2015) Neural Mechanisms of Incentive Saliency in Naturalistic Human Vision.  
981 *Neuron* 85:512–518.
- 982 Hickey C, Peelen MV (2017) Reward Selectively Modulates the Lingering Neural Representation of  
983 Recently Attended Objects in Natural Scenes. *J Neurosci* 37:7297–7304.
- 984 Hupé JM, James AC, Payne BR, Lomber SG, Girard P, Bullier J (1998) Cortical feedback improves  
985 discrimination between figure and background by V1, V2 and V3 neurons. *Nature* 394:784–787.

## HISTORY MODULATES DISTRACTORS

34

- 986 Ipata AE, Gee AL, Bisley JW, Goldberg ME (2009) Neurons in the lateral intraparietal area create a  
987 priority map by the combination of disparate signals. *Experimental Brain Research* 192:479–488.
- 988 Ipata AE, Gee AL, Gottlieb J, Bisley JW, Goldberg ME (2006) LIP responses to a popout stimulus are  
989 reduced if it is overtly ignored. *Nature Neuroscience* 9:1071–1076.
- 990 Itthipuripat S, Vo VA, Sprague TC, Serences JT (2019) Value-driven attentional capture enhances  
991 distractor representations in early visual cortex Tong F, ed. *PLoS Biol* 17:e3000186.
- 992 Itti L, Koch C (2000) A saliency-based search mechanism for overt and covert shifts of visual attention.  
993 *Vision Research* 40:1489–1506.
- 994 Jehee JFM, Ling S, Swisher JD, van Bergen RS, Tong F (2012) Perceptual Learning Selectively Refines  
995 Orientation Representations in Early Visual Cortex. *Journal of Neuroscience* 32:16747–16753.
- 996 Jenkinson M, Bannister P, Brady M, Smith S (2002) Improved Optimization for the Robust and Accurate  
997 Linear Registration and Motion Correction of Brain Images. *NeuroImage* 17:825–841.
- 998 Jenkinson M, Beckmann CF, Behrens TEJ, Woolrich MW, Smith SM (2012) FSL. *NeuroImage* 62:782–  
999 790.
- 1000 Jenkinson M, Smith S (2001) A global optimisation method for robust affine registration of brain images.  
1001 *Medical Image Analysis* 5:143–156.
- 1002 Kamitani Y, Tong F (2005) Decoding the visual and subjective contents of the human brain. *Nat Neurosci*  
1003 8:679–685.
- 1004 Karni A, Sagi D (1991) Where practice makes perfect in texture discrimination: evidence for primary visual  
1005 cortex plasticity. *Proceedings of the National Academy of Sciences* 88:4966–4970.
- 1006 Kastner S (1998) Mechanisms of Directed Attention in the Human Extrastriate Cortex as Revealed by  
1007 Functional MRI. *Science* 282:108–111.
- 1008 Kastner S, Pinsk MA, De Weerd P, Desimone R, Ungerleider LG (1999) Increased Activity in Human  
1009 Visual Cortex during Directed Attention in the Absence of Visual Stimulation. *Neuron* 22:751–761.
- 1010 Kastner S, Ungerleider LG (2000) Mechanisms of Visual Attention in the Human Cortex. *Annu Rev*  
1011 *Neurosci* 23:315–341.
- 1012 Kim H, Anderson BA (2019) Dissociable neural mechanisms underlie value-driven and selection-driven  
1013 attentional capture. *Brain Research* 1708:109–115.
- 1014 Kristjansson A, Vuilleumier P, Schwartz S, Macaluso E, Driver J (2007) Neural Basis for Priming of Pop-  
1015 Out during Visual Search Revealed with fMRI. *Cerebral Cortex* 17:1612–1624.
- 1016 Lawson CL, Hanson RJ (1974) Chapter 23. In: *Solving Least-Squares Problems*. Upper Saddle River,  
1017 New Jersey: Prentice-Hall.
- 1018 Le Pelley ME, Mitchell CJ, Beesley T, George DN, Wills AJ (2016) Attention and associative learning in  
1019 humans: An integrative review. *Psychological Bulletin* 142:1111–1140.
- 1020 Lewis-Peacock JA, Postle BR (2012) Decoding the internal focus of attention. *Neuropsychologia* 50:470–  
1021 478.

## HISTORY MODULATES DISTRACTORS

35

- 1022 Li Z (2002) A saliency map in primary visual cortex. *Trends in Cognitive Sciences* 6:9–16.
- 1023 Luck SJ, Chelazzi L, Hillyard SA, Desimone R (1997) Neural Mechanisms of Spatial Selective Attention in  
1024 Areas V1, V2, and V4 of Macaque Visual Cortex. *Journal of Neurophysiology* 77:24–42.
- 1025 MacLean MH, Giesbrecht B (2015) Neural evidence reveals the rapid effects of reward history on  
1026 selective attention. *Brain Research* 1606:86–94.
- 1027 Maljkovic V, Nakayama K (1994) Priming of pop-out: I. Role of features. *Memory & Cognition* 22:657–  
1028 672.
- 1029 Maunsell JHR (2004) Neuronal representations of cognitive state: reward or attention? *Trends in*  
1030 *Cognitive Sciences* 8:261–265.
- 1031 Mazer JA, Gallant JL (2003) Goal-Related Activity in V4 during Free Viewing Visual Search. *Neuron*  
1032 40:1241–1250.
- 1033 Moher J, Egeth HE (2012) The ignoring paradox: Cueing distractor features leads first to selection, then  
1034 to inhibition of to-be-ignored items. *Attention, Perception, & Psychophysics* 74:1590–1605.
- 1035 Moher J, Lakshmanan BM, Egeth HE, Ewen JB (2014) Inhibition Drives Early Feature-Based Attention.  
1036 *Psychological Science* 25:315–324.
- 1037 Mostert P, Albers AM, Brinkman L, Todorova L, Kok P, de Lange FP (2018) Eye Movement-Related  
1038 Confounds in Neural Decoding of Visual Working Memory Representations. *eNeuro*  
1039 5:ENEURO.0401-17.2018.
- 1040 Motter BC (1993) Focal attention produces spatially selective processing in visual cortical areas V1, V2,  
1041 and V4 in the presence of competing stimuli. *Journal of Neurophysiology* 70:909–919.
- 1042 Mounts JRW (2000) Evidence for suppressive mechanisms in attentional selection: Feature singletons  
1043 produce inhibitory surrounds. *Perception & Psychophysics* 62:969–983.
- 1044 Norman KA, Polyn SM, Detre GJ, Haxby JV (2006) Beyond mind-reading: multi-voxel pattern analysis of  
1045 fMRI data. *Trends in Cognitive Sciences* 10:424–430.
- 1046 Ogawa T, Komatsu H (2006) Neuronal dynamics of bottom-up and top-down processes in area V4 of  
1047 macaque monkeys performing a visual search. *Exp Brain Res* 173:1–13.
- 1048 Olivers CNL, Meijer F, Theeuwes J (2006) Feature-based memory-driven attentional capture: Visual  
1049 working memory content affects visual attention. *Journal of Experimental Psychology: Human*  
1050 *Perception and Performance* 32:1243–1265.
- 1051 Pashler H, Shiu L (1999) Do images involuntarily trigger search? A test of Pillsbury's hypothesis.  
1052 *Psychonomic Bulletin & Review* 6:445–448.
- 1053 Pelli DG (1997) The VideoToolbox software for visual psychophysics: transforming numbers into movies.  
1054 *Spatial Vision* 10:437–442.
- 1055 Poltoratski S, Ling S, McCormack D, Tong F (2017) Characterizing the effects of feature salience and top-  
1056 down attention in the early visual system. *Journal of Neurophysiology* 118:564–573.



## HISTORY MODULATES DISTRACTORS

36

- 1057 Rademaker RL, Chunharas C, Serences JT (2019) Coexisting representations of sensory and mnemonic  
1058 information in human visual cortex. *Nat Neurosci* 22:1336–1344.
- 1059 Rao RPN, Ballard DH (1999) Predictive coding in the visual cortex: a functional interpretation of some  
1060 extra-classical receptive-field effects. *Nat Neurosci* 2:79–87.
- 1061 Reavis EA, Frank SM, Greenlee MW, Tse PU (2016) Neural correlates of context-dependent feature  
1062 conjunction learning in visual search tasks. *Hum Brain Mapp* 37:2319–2330.
- 1063 Reeder RR, Olivers CNL, Pollmann S (2017) Cortical evidence for negative search templates. *Visual*  
1064 *Cognition* 25:278–290.
- 1065 Rungratsameetaweemana N, Serences JT (2019) Dissociating the impact of attention and expectation on  
1066 early sensory processing. *Current Opinion in Psychology* 29:181–186.
- 1067 Saproo S, Serences JT (2010) Spatial Attention Improves the Quality of Population Codes in Human  
1068 Visual Cortex. *Journal of Neurophysiology* 104:885–895.
- 1069 Sawaki R, Luck SJ (2010) Capture versus suppression of attention by salient singletons:  
1070 Electrophysiological evidence for an automatic attend-to-me signal. *Attention, Perception, &*  
1071 *Psychophysics* 72:1455–1470.
- 1072 Schwartz S, Maquet P, Frith C (2002) Neural correlates of perceptual learning: A functional MRI study of  
1073 visual texture discrimination. *Proceedings of the National Academy of Sciences* 99:17137–17142.
- 1074 Serences JT (2008) Value-Based Modulations in Human Visual Cortex. *Neuron* 60:1169–1181.
- 1075 Serences JT, Saproo S (2012) Computational advances towards linking BOLD and behavior.  
1076 *Neuropsychologia* 50:435–446.
- 1077 Serences JT, Yantis S (2006) Selective visual attention and perceptual coherence. *Trends in Cognitive*  
1078 *Sciences* 10:38–45.
- 1079 Serences JT, Yantis S (2007) Spatially Selective Representations of Voluntary and Stimulus-Driven  
1080 Attentional Priority in Human Occipital, Parietal, and Frontal Cortex. *Cerebral Cortex* 17:284–293.
- 1081 Serences JT, Yantis S, Culberson A, Awh E (2004) Preparatory Activity in Visual Cortex Indexes  
1082 Distractor Suppression During Covert Spatial Orienting. *Journal of Neurophysiology* 92:3538–  
1083 3545.
- 1084 Silver MA, Ress D, Heeger DJ (2005) Topographic Maps of Visual Spatial Attention in Human Parietal  
1085 Cortex. *Journal of Neurophysiology* 94:1358–1371.
- 1086 Smith SM, Jenkinson M, Woolrich MW, Beckmann CF, Behrens TEJ, Johansen-Berg H, Bannister PR,  
1087 De Luca M, Drobnjak I, Flitney DE, Niazy RK, Saunders J, Vickers J, Zhang Y, De Stefano N,  
1088 Brady JM, Matthews PM (2004) Advances in functional and structural MR image analysis and  
1089 implementation as FSL. *NeuroImage* 23:S208–S219.
- 1090 Solomon SG, Kohn A (2014) Moving Sensory Adaptation beyond Suppressive Effects in Single Neurons.  
1091 *Current Biology* 24:R1012–R1022.



## HISTORY MODULATES DISTRACTORS

37

- 1092 Somers DC, Dale AM, Seiffert AE, Tootell RBH (1999) Functional MRI reveals spatially specific  
1093 attentional modulation in human primary visual cortex. *Proceedings of the National Academy of*  
1094 *Sciences* 96:1663–1668.
- 1095 Soto D, Heinke D, Humphreys GW, Blanco MJ (2005) Early, Involuntary Top-Down Guidance of Attention  
1096 From Working Memory. *Journal of Experimental Psychology: Human Perception and*  
1097 *Performance* 31:248–261.
- 1098 Sprague TC, Adam KCS, Foster JJ, Rahmati M, Sutterer DW, Vo VA (2018a) Inverted Encoding Models  
1099 Assay Population-Level Stimulus Representations, Not Single-Unit Neural Tuning. *eNeuro*  
1100 5:ENEURO.0098-18.2018.
- 1101 Sprague TC, Boynton GM, Serences JT (2019) The Importance of Considering Model Choices When  
1102 Interpreting Results in Computational Neuroimaging. *eNeuro* 6:ENEURO.0196-19.2019.
- 1103 Sprague TC, Itthipuripat S, Vo VA, Serences JT (2018b) Dissociable signatures of visual salience and  
1104 behavioral relevance across attentional priority maps in human cortex. *Journal of*  
1105 *Neurophysiology* Available at: <http://www.physiology.org/doi/10.1152/jn.00059.2018> [Accessed  
1106 March 20, 2018].
- 1107 Sprague TC, Serences JT (2013) Attention modulates spatial priority maps in the human occipital,  
1108 parietal and frontal cortices. *Nature Neuroscience* 16:1879–1887.
- 1109 Spratling MW (2008) Predictive coding as a model of biased competition in visual attention. *Vision*  
1110 *Research* 48:1391–1408.
- 1111 Spratling MW (2017) A review of predictive coding algorithms. *Brain and Cognition* 112:92–97.
- 1112 Srinivasan MV, Laughlin SB, Dubs A (1982) Predictive coding: a fresh view of inhibition in the retina. *Proc*  
1113 *R Soc Lond B* 216:427–459.
- 1114 Stanisor L, van der Togt C, Pennartz CMA, Roelfsema PR (2013) A unified selection signal for attention  
1115 and reward in primary visual cortex. *Proceedings of the National Academy of Sciences*  
1116 110:9136–9141.
- 1117 Summerfield C, de Lange FP (2014) Expectation in perceptual decision making: neural and  
1118 computational mechanisms. *Nat Rev Neurosci* 15:745–756.
- 1119 Swisher JD, Halko MA, Merabet LB, McMains SA, Somers DC (2007) Visual Topography of Human  
1120 Intraparietal Sulcus. *Journal of Neuroscience* 27:5326–5337.
- 1121 Theeuwes J (1992) Perceptual selectivity for color and form. *Perception & Psychophysics* 51:599–606.
- 1122 Theeuwes J (2019) Goal-driven, stimulus-driven, and history-driven selection. *Current Opinion in*  
1123 *Psychology* 29:97–101.
- 1124 Tong F, Pratte MS (2012) Decoding Patterns of Human Brain Activity. *Annu Rev Psychol* 63:483–509.
- 1125 Tootell RBH, Hadjikhani N, Hall EK, Marrett S, Vanduffel W, Vaughan JT, Dale AM (1998) The Retinotopy  
1126 of Visual Spatial Attention. *Neuron* 21:1409–1422.
- 1127 Treisman AM, Gelade G (1980) A feature-integration theory of attention. *Cognitive Psychology* 12:97–  
1128 136.

- 1129 Turatto M, Bonetti F, Pascucci D, Chelazzi L (2018) Desensitizing the attention system to distraction while  
1130 idling: A new latent learning phenomenon in the visual attention domain. *Journal of Experimental*  
1131 *Psychology: General* 147:1827–1850.
- 1132 Turatto M, Galfano G (2001) Attentional capture by color without any relevant attentional set. *Perception*  
1133 *& Psychophysics* 63:286–297.
- 1134 Turatto M, Pascucci D (2016) Short-term and long-term plasticity in the visual-attention system: Evidence  
1135 from habituation of attentional capture. *Neurobiology of Learning and Memory* 130:159–169.
- 1136 van Bergen RS, Jehee JFM (2019) Probabilistic Representation in Human Visual Cortex Reflects  
1137 Uncertainty in Serial Decisions. *J Neurosci* 39:8164–8176.
- 1138 van Bergen RS, Ji Ma W, Pratte MS, Jehee JFM (2015) Sensory uncertainty decoded from visual cortex  
1139 predicts behavior. *Nat Neurosci* 18:1728–1730.
- 1140 Van Moorselaar D, Slagter HA (2020) Inhibition in selective attention. *Annals of the New York Academy*  
1141 *of Sciences* 1464:204–221.
- 1142 Vatterott DB, Vecera SP (2012) Experience-dependent attentional tuning of distractor rejection. *Psychon*  
1143 *Bull Rev* 19:871–878.
- 1144 Wang B, Theeuwes J (2018a) Statistical regularities modulate attentional capture. *Journal of*  
1145 *Experimental Psychology: Human Perception and Performance* 44:13–17.
- 1146 Wang B, Theeuwes J (2018b) How to inhibit a distractor location? Statistical learning versus active, top-  
1147 down suppression. *Attention, Perception, & Psychophysics* Available at:  
1148 <http://link.springer.com/10.3758/s13414-018-1493-z> [Accessed March 20, 2018].
- 1149 Westerberg JA, Cox MA, Dougherty K, Maier A (2019) V1 microcircuit dynamics: altered signal  
1150 propagation suggests intracortical origins for adaptation in response to visual repetition. *Journal*  
1151 *of Neurophysiology* 121:1938–1952.
- 1152 Wolfe JM (1994) Guided Search 2.0 A revised model of visual search. *Psychonomic Bulletin & Review*  
1153 1:202–238.
- 1154 Won B-Y, Forloines M, Zhou Z, Geng JJ (2020) Changes in visual cortical processing attenuate singleton  
1155 distraction during visual search. *Cortex* 132:309–321.
- 1156 Won B-Y, Geng JJ (2020) Passive exposure attenuates distraction during visual search. *Journal of*  
1157 *Experimental Psychology: General* Available at:  
1158 <http://doi.apa.org/getdoi.cfm?doi=10.1037/xge0000760> [Accessed June 15, 2020].
- 1159 Zhang W, Luck SJ (2009) Feature-based attention modulates feedforward visual processing. *Nat*  
1160 *Neurosci* 12:24–25.
- 1161 Zhang X, Zhaoping L, Zhou T, Fang F (2012) Neural Activities in V1 Create a Bottom-Up Saliency Map.  
1162 *Neuron* 73:183–192.
- 1163
